# Supplementary material
Source: Elsevier journal article supplement (https://cris.unibo.it/retrieve/handle/11585/1009504/7001e711-59da-4d2d-b049-f6db660267c7/mmc1.docx)

**SUPPLEMENTARY MATERIAL**

**Working Group**

Daniela Berardinelli (Department of Clinical and Biological Sciences, San Luigi Hospital, University of Turin, Turin, Italy)

Celeste Cagnazzo (Department of Sciences of Public Health and Pediatrics, University of Turin, Turin, Italy. Division of Paediatric Onco-Haematology, Stem Cell Transplantation and Cellular Therapy, Città della Salute e della Scienza Hospital, Turin, Italy)

Angelo Cianciulli *(*Department of Public Health and Infectious Diseases, Hygiene section - Sapienza University of Rome, Rome, Italy)

Stefano Ciardullo (Department of Medicine and Rehabilitation, Policlinico di Monza, Monza, Italy.

Department of Medicine and Surgery, University of Milano Bicocca, Milan, Italy)

Andrea Cinnirella (Department of Biomedical Sciences for Health, Postgraduate School of Public Health, University of Milan, Milan, Italy)

Michela Cinquini (Laboratorio di Metodologia delle revisioni sistematiche e produzione di Linee Guida, Istituto di Ricerche Farmacologiche Mario Negri IRCCS, Milan, Italy)

Giorgio Costantino (Fondazione IRCCS Ca' Granda, Ospedale Maggiore Policlinico, University of Milan, Milan, Italy)

Paola De Nardi (Gastrointestinal Surgery, IRCCS San Raffaele Scientific Institute, Milan, Italy)

Mariarosaria Gammone (S.I.T.R.A, Fondazione IRCCS Istituto Neurologico Carlo Besta, Milan, Italy)

Marien González-Lorenzo (Laboratorio di Metodologia delle revisioni sistematiche e produzione di Linee Guida, Istituto di Ricerche Farmacologiche Mario Negri IRCCS, Milan, Italy)

Francesca Grosso (Department of Biomedical Sciences for Health, Postgraduate School of Public Health, University of Milan, Milan, Italy)

Paolo Iovino (Department of Biomedicine and Prevention University of Rome Tor Vergata, Rome, Italy. School of Nursing, Midwifery and Paramedicine Faculty of Health Science, Australian Catholic University, Melbourne, Australia)

Alex Lando (Laboratory of Rehabilitation Technologies, IRCCS San Camillo Hospital, Venice, Italy)

Francesco Luceri (ASST Centro Specialistico Ortopedico Traumatologico Gaetano Pini-CTO, Milan, Italy)

Silvia Minozzi (Department of Epidemiology, Lazio Regional Health Service, Rome, Italy)

Lorenzo Moja (Department of Biomedical Sciences for Health, University of Milan, Milan, Italy)

Marco Rissone (Department of Public Health, Experimental and Forensic Medicine, University of Pavia, Pavia, Italy)

Giovanni Simeone (Local Health Unit, Brindisi, Italy)

Marta Stracuzzi (Pediatric Infectious Disease Unit, Department of Pediatrics, Luigi Sacco Hospital, University of Milan, Milan, Italy)

Giovanna Venezia (Gastroenterology Unit; S.Croce e Carle Hospital, Cuneo, Italy)

Giuseppe Venuti ( Division of Cardiology, Papardo Hospital, Messina, Italy)

Stefania Vultaggio (IN&FO&MED srl, Milan Italy)

Emiliano Zambarbieri (Reparto di cure palliative, Ospedale "Santa Maria delle Stelle" di Melzo, ASST Melegnano e Martesana, Milano, Italy)

**Search strategies**

**PUBMED (31/05/2021)**

"Systematic Review"[Title/Abstract] OR "systematic reviews"[Title/Abstract] OR "Cochrane"[Title/Abstract] OR "Meta Analysis"[Title/Abstract] OR "Meta-Analysis"[Title/Abstract] OR "Metaanalysis"[Title/Abstract] OR "Systematic Review"[Publication Type] OR "Systematic Reviews as Topic"[MeSH Terms] OR "Meta-Analysis"[Publication Type] OR "Meta-Analysis as Topic"[MeSH Terms] OR "Systematic literature Review"[Title/Abstract]

AND

"Randomized Controlled Trial"[Publication Type] OR "Randomized Controlled Trials as Topic"[MeSH Terms] OR "Controlled Clinical Trial"[Publication Type] OR "Randomized Controlled Trial"[Title/Abstract] OR "Randomised Controlled Trial"[Title/Abstract] OR "Randomized Controlled Trials"[Title/Abstract] OR "Randomised Controlled Trials"[Title/Abstract] OR "RCT"[Title/Abstract] OR "RCTs"[Title/Abstract]

AND

"ROB2"[Text Word] OR "ROB-2"[Text Word] OR "ROB 2.0"[Text Word] OR "ROB 2"[Text Word] OR "revised cochrane risk-of-bias"[Text Word] OR "revised cochrane risk of bias"[Text Word]

AND (2019:2021[pdat])

**EMBASE (31/05/2021)**

('systematic review'/exp OR 'review, systematic':ti,ab,kw OR 'systematic review':ti,ab,kw OR 'cochrane library'/exp OR 'cochrane central':ti,ab,kw OR 'cochrane central register of controlled trials':ti,ab,kw OR 'cochrane controlled trials register':ti,ab,kw OR 'cochrane database of systematic reviews':ti,ab,kw OR 'cochrane library':ti,ab,kw OR 'cochrane database':ti,ab,kw OR 'meta analysis'/exp OR 'analysis, meta':ti,ab,kw OR 'meta analysis':ti,ab,kw OR 'meta-analysis':ti,ab,kw OR 'metaanalysis':ti,ab,kw OR 'literature review'/exp) AND ('randomized controlled trial'/exp OR 'controlled trial, randomized' OR 'randomised controlled study' OR 'randomised controlled trial' OR 'randomized controlled study' OR 'randomized controlled trial' OR 'trial, randomized controlled') AND ('risk of bias'/exp OR rob2 OR 'rob 2.0' OR 'revised cochrane risk of bias' OR 'revised cochrane risk-of-bias' OR 'rob 2') AND [2019-2021]/py

**Cochrane Library (31/05/2021)**

#83 MeSH descriptor: [Systematic Reviews as Topic] explode all trees

#84 ("Systematic Review" OR "systematic reviews" OR "Cochrane" OR "Meta Analysis" OR "Meta-Analysis" OR "Metaanalysis" OR "Systematic literature Review"):ti,ab,kw

#85 MeSH descriptor: [Meta-Analysis as Topic] explode all trees

#86 #83 OR #84 OR #85

#87 MeSH descriptor: [Randomized Controlled Trials as Topic] explode all trees

#88 ("Randomized Controlled Trial" OR "Randomised Controlled Trial" OR "Randomized Controlled Trials" OR "Randomised Controlled Trials" OR "RCT" OR "RCTs"):ti,ab,kw

#89 #87 OR #88

#92 "ROB2" OR "ROB-2" OR "ROB 2.0" OR "ROB 2" OR "revised cochrane risk-of-bias" OR "revised cochrane risk of bias"

#93 #86 AND #89 AND #92 with Cochrane Library publication date Between Jan 2019 and Jun 2021

**Characteristics of excluded studies**

| **Reference** | | **Reason of exclusion** |
| --- | --- | --- |
|  | Alwidyan T, Parsons C. Deprescribing of medications in older patients in the last three months of life: A systematic review. International Journal of Pharmacy Practice. 2020; 28:56-7. doi: 10.1111/ijpp.12573. | Conference abstract |
|  | Babineau-Therrien J, Gagné M, Boulet LP. Training educators to deliver effective educational sessions in adults with asthma: A systematic review and meta-analysis. Canadian Journal of Respiratory, Critical Care, and Sleep Medicine. 2019; 3:39-40. doi: 10.1080/24745332.2019.1623590. | Conference abstract |
|  | Bohórquez-Medina SL, Bohórquez-Medina AL, Benites Zapata VA, Ignacio Cconchoy F, Toro Huamanchumo CJ, Bendezu Quispe G, et al. Spirulina Supplementation and Obesity Related Metabolic Disorders: A Systematic Review and Meta-Analysis of Randomized Controlled Clinical Trials. Metabolism: Clinical and Experimental. 2021;116. doi: 10.1016/j.metabol.2020.154607. | Conference abstract |
|  | Bordewijk EM, Wang R, van Wely M, Costello MF, Norman RJ, Teede H, et al. To share or not to share data: how valid are trials evaluating first-line ovulation induction for polycystic ovary syndrome? Human reproduction update. 2020;26(6):929-41. Epub 2020/09/17. doi: 10.1093/humupd/dmaa031. PubMed PMID: 32935841. | A meta-epidemiological study |
|  | Bourdon M, Peigné M, Solignac C, Darné BM, Languille S, Pocate-Cheriet K, et al. THE NEW STANDARD FOR OVULATION TRIGGERING SHOULD BE GnRH AGONIST OVER HCG DURING CONTROLLED OVARIAN STIMULATION FOR IVF/ICSI: A SYSTEMATIC REVIEW AND META-ANALYSIS. Fertility and Sterility.2020;114(3): e163-e4.doi: 10.1016/j.fertnstert.2020.08.467. | Conference abstract |
|  | Brown T, Moore THM, Hooper L, Gao Y, Zayegh A, Ijaz S, et al. Interventions for preventing obesity in children. Cochrane Database of Systematic Reviews. 2019(7). doi: 10.1002/14651858.CD001871.pub4. PubMed PMID: CD001871. | RoB1 |
|  | Carrier FM, Chassé M, Wang HT, Aslanian P, Iorio S, Bilodeau M, et al. Perioperative fluid management strategies and postoperative outcomes in liver transplantation: A systematic review. Transplantation. 2019;103(8):74. doi: 10.1097/01. tp.0000580472.17422.db. | Conference abstract |
|  | Chong LY, Piromchai P, Sharp S, Snidvongs K, Webster KE, Philpott C, et al. Biologics for chronic rhinosinusitis. Cochrane Database of Systematic Reviews. 2021(3). doi: 10.1002/14651858.CD013513.pub3. PubMed PMID: CD013513. | RoB1 |
|  | Cochrane M, Mitchell E, Hollingworth W, Crawley E, Trépel D. Cost-effectiveness of Interventions for Chronic Fatigue Syndrome or Myalgic Encephalomyelitis: A Systematic Review of Economic Evaluations. Applied health economics and health policy. 2021:1-14. Epub 2021/03/02. doi: 10.1007/s40258-021-00635-7. PubMed PMID: 33646528; PubMed Central PMCID: PMCPMC7917957 included in the narrative synthesis. Madeleine Cochrane, Eileen Mitchell, William Hollingworth, Esther Crawley, and Dominic Trépel have no other conflicts of interest or competing interests. | Economic evaluation; no prespecified outcomes |
|  | Crossingham I, Turner S, Ramakrishnan S, Fries A, Gowell M, Yasmin F, et al. Combination fixed‐dose beta agonist and steroid inhaler as required for adults or children with mild asthma. Cochrane Database of Systematic Reviews. 2021(5). doi: 10.1002/14651858.CD013518.pub2. PubMed PMID: CD013518. | RoB1 |
|  | Fahmy A, El-Qushayri AE, Abdelaziz A, Tawfik A, Abou-Ali A. Systemic antibiotics for the prevention of ventilator-associated pneumonia: A meta-analysis. Critical Care Medicine. 2021;49(1 SUPPL 1):318. doi: 10.1097/01.ccm.0000728476.93550.7b. | Conference abstract |
|  | Gibbison B, Villalobos Lizardi JC, Avilés Martínez KI, Fudulu DP, Medina Andrade M, Pérez-Gaxiola G, et al. Prophylactic corticosteroids for paediatric heart surgery with cardiopulmonary bypass. Cochrane Database of Systematic Reviews. 2020(10). doi: 10.1002/14651858.CD013101.pub2. PubMed PMID: CD013101. | RoB1 |
|  | Grant K, Bayley C, Lang E, Innes G. Optimizing diagnostic testing processes to improve emergency department throughput: A systematic review. Canadian Journal of Emergency Medicine. 2020;22: S18. doi: 10.1017/cem.2020.86. | Conference abstract |
|  | Habib GM, Rabinovich R, Divgi K, Ahmed S, Saha SK, Singh S, et al. Systematic review of clinical effectiveness, components, and delivery of pulmonary rehabilitation in low-resource settings. npj Primary Care Respiratory Medicine. 2020;30(1). doi: 10.1038/s41533-020-00210-y. | RoB1 |
|  | Houghton JSM, Nickinson ATO, Bridgwood B, Nduwayo S, Pepper CJ, Rayt HS, et al. Prevalence of Cognitive Impairment in Individuals with Vascular Surgical Pathology: a Systematic Review and Meta-Analysis. European Journal of Vascular and Endovascular Surgery. 2021;61(4):664-74. doi: 10.1016/j.ejvs.2020.12.016. | No assessment of intervention efficacy.  Not appropriate use of ROB-2 (on prevalence studies) |
|  | Jauch K, Kowark A, Coburn M, Clusmann H, Höllig A. Randomized Controlled Trials on Intracerebral Hemorrhage: A Cross Sectional Retrospective Analysis of CONSORT Item Adherence. Frontiers in neurology. 2019; 10:991. Epub 2019/10/17. doi: 10.3389/fneur.2019.00991. PubMed PMID: 31616358; PubMed Central PMCID: PMCPMC6763943. | Aim is quality of reporting and conduct of studies. |
|  | Kant-Smits K, Van Brussel M, Van Der Net J. Reducing fatigue in paediatric rheumatic conditions: A systematic review. Pediatric Rheumatology. 2020;18(SUPPL 2). doi: 10.1186/s12969-020-00470-5. | Conference abstract |
|  | Keenan H, Koski-Klein A, Du Mosch M, Leslie E, Lajoie K, Brown D, et al. The effects of physical activity on quality of life in the pediatric oncology population: A systematic review. Rehabilitation Oncology. 2019;37(1): E14-E5. doi: 10.1097/01.REO.0000000000000164. | Conference abstract |
|  | Kulkarni S, Durham H, Glover L, Cousens L, Blomgran P, Ather O, et al. Metabolic side effects of systemic corticosteroids-a systematic review. Hypertension. 2020;76(SUPPL 1). doi: 10.1161/hyp.76.suppl_1. P176. | Conference abstract |
|  | Mheissen S, Khan H, Aldandan M. Limited evidence on differences between fixed appliances and clear aligners regarding pain level. Evidence-based dentistry. 2020;21(4):144-5. Epub 2020/12/20. doi: 10.1038/s41432-020-0140-4. PubMed PMID: 33339979. | Commentary |
|  | Ndunda PM, Vindhyal M, Srinivasan S, Muutu T, Fanari Z. Transcatheter versus Surgical Aortic Valve Replacement in Patients with Chronic Liver Disease: A Meta-analysis. JACC: Cardiovascular Interventions. 2019;12(4): S50. doi: 10.1016/j.jcin.2019.01.176. | ROBINS-I |
|  | Ndunda PM, Muutu T, Vindhyal M, Khayyat S, Fanari Z. Clinical Outcomes of the Dual-Therapy CD34 Antibody-Covered Sirolimus-Eluting Stent Versus Standard Drug-Eluting Coronary Stents: A Meta-Analysis. JACC: Cardiovascular Interventions. 2019;12(4): S39-S40. doi: 10.1016/j.jcin.2019.01.143. | Conference abstract |
|  | Ocskay K, Kanjo A, Gede N, Eross B, Pár G, Szakács Z, et al. Impact of liver support systems in acute-on-chronic liver failure: Uncertainty remains-a systematic review and network meta-analysis. Intensive Care Medicine Experimental. 2020;8(SUPPL 2). doi: 10.1186/s40635-020-00354-8. | Conference abstract |
|  | Piechotta V, Chai KL, Valk SJ, Doree C, Monsef I, Wood EM, Lamikanra A, Kimber C, McQuilten Z, So-Osman C, Estcourt LJ, Skoetz N. Convalescent plasma or hyperimmune immunoglobulin for people with COVID-19: a living systematic review. Cochrane Database Syst Rev. 2020 Jul 10;7(7):CD013600. doi: 10.1002/14651858.CD013600.pub2. PMID: 32648959. | RoB1 |
|  | Mellado BH, Pilger TL, Poli Neto OB, Rosa E Silva JC, Nogueira AA, do Vale Brandão C, Candido Dos Reis FJ. Daily life attitudes of women with moderate or severe chronic pelvicpain. A qualitative study. Eur J Obstet Gynecol Reprod Biol. 2020 Nov; 254:109-113. doi: 10.1016/j.ejogrb.2020.09.001. Epub 2020 Sep 9. PMID: 32950889 | Conference abstract |
|  | Rank CU, Lynggaard LS, Als-Nielsen B, Stock W, Toft N, Nielsen OJ, et al. Prophylaxis of thromboembolism during therapy with asparaginase in adults with acute lymphoblastic leukaemia. Cochrane Database of Systematic Reviews. 2020(10). doi: 10.1002/14651858.CD013399.pub2. PubMed PMID: CD013399. | RoB1 |
|  | Rees K, Al-Khudairy L, Takeda A, Stranges S. Vegan dietary pattern for the primary and secondary prevention of cardiovascular diseases. Cochrane Database of Systematic Reviews. 2021(2). doi: 10.1002/14651858.CD013501.pub2. PubMed PMID: CD013501. | RoB1 |
|  | Sanyal S, Srivastava A, Jaiswal S, Srivastava S. A meta-analysis on predicting qEEG as biomarker for treatment response in depression. Indian Journal of Psychiatry. 2020;62(7): S55. | Conference abstract |
|  | Schuster HJ, de Jonghe BA, Limpens J, Budding AE, Painter RC. Asymptomatic vaginal Candida colonization and adverse pregnancy outcomes including preterm birth: a systematic review and meta-analysis. American journal of obstetrics & gynecology MFM. 2020;2(3):100163. Epub 2020/12/22. doi: 10.1016/j.ajogmf.2020.100163. PubMed PMID: 33345884. | No assessment of intervention efficacy |
|  | Tucci M, de Miranda AA, Aniz Gomes de Oliveira PV, da Ponte AM, Singh S, de Moura DT, et al. STENT VERSUS BALLOON DILATION FOR THE TREATMENT OF DOMINANT STRICTURES IN PRIMARY SCLEROSING CHOLANGITIS: A SYSTEMATIC REVIEW AND META-ANALYSIS. Gastrointestinal Endoscopy. 2020;91(6): AB388. doi: 10.1016/j.gie.2020.03.3876. | Conference abstract |
|  | Uphoff E, Ekers D, Robertson L, Dawson S, Sanger E, South E, et al. Behavioural activation therapy for depression in adults. Cochrane Database of Systematic Reviews. 2020(7). doi: 10.1002/14651858.CD013305.pub2. PubMed PMID: CD013305. | RoB1 |
|  | Williams CA, Wadey C, Pieles G, Stuart G, Taylor RS, Long L. Physical activity interventions for people with congenital heart disease. The Cochrane database of systematic reviews. 2020;10: Cd013400. Epub 2020/10/29. doi: 10.1002/14651858.CD013400.pub2. PubMed PMID: 33112424. | Systematic review protocol |
|  | Wong YJ. Does oral Nonsteroidal Anti-inflammatory Drugs (NSAIDs) premedication in patients with irreversible pulpitis increase the success rate of inferior alveolar nerve block? Evidence-based dentistry. 2019;20(1):20-1. Epub 2019/03/25. doi: 10.1038/s41432-019-0014-9. PubMed PMID: 30903123. | Commentary |
|  | Yang W, Chen ZH, Yi ZY, Huang XD, Han QM, Zhang RH. Effectiveness of intra-articular injection of hyaluronic acid versus placebo in the treatment of early and mid-stage knee osteoarthritis: A meta-analysis based on randomized, double-blind, controlled, clinical trials. Chinese Journal of Tissue Engineering Research. 2021;25(23):3760-6. doi: 10.12307/2021.051. | Chinese article |
|  | Ye X, Chang Y, Findlay M, Brown T, Bauer J. Effct of route and timing of enteral nutrition support on tube feeding duration, tube-related complications and dysphagia in patients with head and neck cancer undergoing treatment: a systematic review. Clinical Nutrition ESPEN. 2020; 40:666-7. doi: 10.1016/j.clnesp.2020.09.787. | Conference abstract |
|  | Zharichenko N, Njoku DB. The Role of Pro-Inflammatory and Regulatory Signaling by IL-33 in the Brain and Liver: A Focused Systematic Review of Mouse and Human Data and Risk of Bias Assessment of the Literature. International journal of molecular sciences. 2020;21(11). Epub 2020/06/04. doi: 10.3390/ijms21113933. PubMed PMID: 32486265; PubMed Central PMCID: PMCPMC7312033. | No assessment of intervention efficacy |
|  | Zhang B, Huang X, Huo S, Zhang C, Zhao S, Cen X, et al. Effect of clear aligners on oral health-related quality of life: A systematic review. Orthodontics & craniofacial research. 2020;23(4):363-70. Epub 2020/04/28. doi: 10.1111/ocr.12382. PubMed PMID: 32340082. | No assessment of intervention efficacy  (Included studies are not RCT) |

**References of included studies**

1. Abraham LN, Sibilitz KL, Berg SK, Tang LH, Risom SS, Lindschou J, et al. Exercise‐based cardiac rehabilitation for adults after heart valve surgery. Cochrane Database of Systematic Reviews. 2021(5). doi: 10.1002/14651858.CD010876.pub3. PubMed PMID: CD010876.
2. Afonso J, da Costa IT, Camões M, Silva A, Lima RF, Milheiro A, et al. The Effects of Agility Ladders on Performance: A Systematic Review. International journal of sports medicine. 2020;41(11):720-8. Epub 2020/05/13. doi: 10.1055/a-1157-9078. PubMed PMID: 32396965.
3. Afonso J, Clemente FM, Nakamura FY, Morouço P, Sarmento H, Inman RA, et al. The Effectiveness of Post-exercise Stretching in Short-Term and Delayed Recovery of Strength, Range of Motion and Delayed Onset Muscle Soreness: A Systematic Review and Meta-Analysis of Randomized Controlled Trials. Frontiers in physiology. 2021; 12:677581. Epub 2021/05/25. doi: 10.3389/fphys.2021.677581. PubMed PMID: 34025459; PubMed Central PMCID: PMCPMC8133317.
4. Aïem E, Joseph C, Garcia A, Smaïl-Faugeron V, Muller-Bolla M. Caries removal strategies for deep carious lesions in primary teeth: Systematic review. International journal of paediatric dentistry. 2020;30(4):392-404. Epub 2020/01/17. doi: 10.1111/ipd.12616. PubMed PMID: 31943437.
5. Alakttash AM, Fawzi M, Bearn D. Adhesive precoated bracket systems and operator coated bracket systems: Is there any difference? A systematic review and meta-analysis. The Angle orthodontist. 2019;89(3):495-504. Epub 2018/12/
6. Al-Dboush R, Flores-Mir C, El-Bialy T. Impact of intraoral non-pharmacological non-surgical adjunctive interventions on orthodontically induced inflammatory root resorption in humans: A systematic review. Orthodontics & Craniofacial research. 2021. Epub 2021/02/11. doi: 10.1111/ocr.12476. PubMed PMID: 33567160.
7. Almouzain L, Hamilton F, Stevenson F, Chard D, Abdulrahman N. Effect of switching disease modifying drugs on relapse rate in stable relapsing remitting multiple sclerosis patients planning for pregnancy: On-demand eposters p0001-p0286. Multiple Sclerosis Journal. 2020;26(3 SUPPL):152-3. doi: 10.1177/1352458520974937.
8. Al-Saeedi M, Ramouz A, Khajeh E, El Rafidi A, Ghamarnejad O, Shafiei S, et al. Endocystectomy as a conservative surgical treatment for hepatic cystic echinococcosis: A systematic review with single-arm meta-analysis. PLoS neglected tropical diseases. 2021;15(5): e0009365. doi: 10.1371/journal.pntd.0009365.
9. Ang L, Song E, Jun JH, Choi TY, Lee MS. Acupuncture for treating diabetic retinopathy: A systematic review and meta-analysis of randomized controlled trials. Complementary therapies in medicine. 2020; 52:102490. Epub 2020/09/22. doi: 10.1016/j.ctim.2020.102490. PubMed PMID: 32951739.
10. Annoni F, Peluso L, Fiore M, Nordberg P, Svensson L, Abella B, et al. Impact of therapeutic hypothermia during cardiopulmonary resuscitation on neurologic outcome: A systematic review and meta-analysis. Resuscitation. 2021; 162:365-71. Epub 2021/02/06. doi: 10.1016/j.resuscitation.2021.01.029. PubMed PMID: 33545107.
11. Apessos I, Voulgaris A, Agrafiotis M, Andreadis D, Steiropoulos P. Effect of periodontal therapy on COPD outcomes: a systematic review. BMC Pulmonary Medicine. 2021;21(1). doi: 10.1186/s12890-021-01429-2.
12. Arn ML, Dritsas K, Pandis N, Kloukos D. The effects of fixed orthodontic retainers on periodontal health: A systematic review. American journal of orthodontics and dentofacial orthopedics: official publication of the American Association of Orthodontists, its constituent societies, and the American Board of Orthodontics. 2020;157(2):156-64. e17. Epub 2020/02/02. doi: 10.1016/j.ajodo.2019.10.010. PubMed PMID: 32005466.
13. Askland K, Wright L, Wozniak DR, Emmanuel T, Caston J, Smith I. Educational, supportive and behavioural interventions to improve usage of continuous positive airway pressure machines in adults with obstructive sleep apnoea. Cochrane Database of Systematic Reviews. 2020(4). doi: 10.1002/14651858.CD007736.pub3. PubMed PMID: CD007736.
14. Ávila-Curiel BX, Gómez-Aguirre JN, Gijón-Soriano AL, Acevedo-Mascarúa AE, Argueta-Figueroa L, Torres-Rosas R. Complementary interventions for pain in patients with temporomandibular joint disorders: a systematic review. Revista Internacional de Acupuntura. 2020;14(4):151-9. doi: 10.1016/j.acu.2020.10.004.
15. Azarcon CP, Artiaga JCM. Comparison of Pain Scores Among Patients Undergoing Conventional and Novel Panretinal Photocoagulation for Diabetic Retinopathy: A Systematic Review. Clinical ophthalmology (Auckland, NZ). 2021; 15:953-71. Epub 2021/03/11. doi: 10.2147/opth. S294227. PubMed PMID: 33688163.PubMed Central PMCID: PMCPMC7936685.
16. Aziz Z, Huin WK, Hisham MDB, Ng JX. Effects of pomegranate on lipid profiles: A systematic review of randomised controlled trials. Complementary therapies in medicine. 2020;48: 102236. Epub 2020/01/29. doi: 10.1016/j.ctim.2019.102236. PubMed PMID: 31987256.
17. Bach FL, Sairally BZF, Latthe P. Effect of oestrogen therapy on faecal incontinence in postmenopausal women: a systematic review. International urogynecology journal. 2020;31(7):1289-97. Epub 2020/03/05. doi: 10.1007/s00192-020-04252-1. PubMed PMID: 32130466; PubMed Central PMCID: PMCPMC7306041.
18. Bakdach WMM, Hadad R. Is there any enhanced treatment effect on class II growing patients when Forsus Fatigue Resistant Device is reinforced by either miniplates or miniscrews? A systematic review and meta-analysis. International orthodontics. 2021;19(1):15-24. Epub 2021/02/09. doi: 10.1016/j.ortho.2021.01.003. PubMed PMID: 33551328.
19. Baldwin M, Nagra NS, Greenall G, Carr AJ, Beard D, Rees JL, et al. Use of implantable meshes for augmented rotator cuff repair: a systematic review and meta-analysis. BMJ open. 2020;10(12): e039552. Epub 2020/12/10. doi: 10.1136/bmjopen-2020-039552. PubMed PMID: 33293307; PubMed Central PMCID: PMCPMC7722806.
20. Balian A, Cirio S, Salerno C, Wolf TG, Campus G, Cagetti MG. Is visual pedagogy effective in improving cooperation towards oral hygiene and dental care in children with autism spectrum disorder? A systematic review and meta-analysis. International Journal of Environmental Research and Public Health. 2021;18(2):1-22. doi: 10.3390/ijerph18020789.
21. Baunwall SMD, Lee MM, Eriksen MK, Mullish BH, Marchesi JR, Dahlerup JF, et al. Faecal microbiota transplantation for recurrent Clostridioides difficile infection: An updated systematic review and meta-analysis. EClinicalMedicine. 2020;29-30:100642. Epub 2021/01/14. doi: 10.1016/j.eclinm.2020.100642. PubMed PMID: 33437951; PubMed Central PMCID: PMCPMC7788438.
22. Bausch K, Halbeisen FS, Aghlmandi S, Sutter SU, Ewald H, Appenzeller-Herzog C, et al. Antimicrobial Prophylaxis for Postoperative Urinary Tract Infections in Transurethral Resection of Bladder Tumors: A Systematic Review and Meta-Analysis. The Journal of urology. 2021;205(4):987-98. Epub 2020/12/08. doi: 10.1097/ju.0000000000001513. PubMed PMID: 33284673.
23. Bhagavan C, Kung S, Doppen M, John M, Vakalalabure I, Oldfield K, et al. Cannabinoids in the Treatment of Insomnia Disorder: A Systematic Review and Meta-Analysis. CNS drugs. 2020;34(12):1217-28. Epub 2020/11/28. doi: 10.1007/s40263-020-00773-x. PubMed PMID: 33244728.
24. Borges GA, Barbin T, Dini C, Maia LC, Magno MB, Barão VAR, et al. Patient-reported outcome measures and clinical assessment of implant-supported overdentures and fixed prostheses in mandibular edentulous patients: A systematic review and meta-analysis. The Journal of prosthetic dentistry. 2020. Epub 2021/01/05. doi: 10.1016/j.prosdent.2020.11.005. PubMed PMID: 33390270.
25. Bortolotti F, Solidoro L, Bartolucci ML, Incerti Parenti S, Paganelli C, Alessandri-Bonetti G. Skeletal and dental effects of surgically assisted rapid palatal expansion: a systematic review of randomized controlled trials. European journal of orthodontics. 2020;42(4):434-40. Epub 2019/08/01. doi: 10.1093/ejo/cjz057. PubMed PMID: 31365925.
26. Cabral LQT, Ximenez JA, Moreno KGT, Fernandes R. Probiotics have minimal effects on appetite-related hormones in overweight or obese individuals: A systematic review of randomized controlled trials. Clinical nutrition (Edinburgh, Scotland). 2021;40(4):1776-87. Epub 2020/11/05. doi: 10.1016/j.clnu.2020.10.028. PubMed PMID: 33143930.
27. Cardoso PC, Espinosa DG, Mecenas P, Flores-Mir C, Normando D. Pain level between clear aligners and fixed appliances: a systematic review. Progress in orthodontics. 2020;21(1):3. Epub 2020/01/21. doi: 10.1186/s40510-019-0303-z. PubMed PMID: 31956934; PubMed Central PMCID: PMCPMC6970090.
28. Cavero-Redondo I, Deeks JJ, Alvarez-Bueno C, Jolly K, Saz-Lara A, Price M, et al. Comparative effect of physical exercise versus statins on improving arterial stiffness in patients with high cardiometabolic risk: A network meta-analysis. PLoS medicine. 2021;18(2): e1003543. Epub 2021/02/17. doi: 10.1371/journal.pmed.1003543. PubMed PMID: 33591983; PubMed Central PMCID: PMCPMC7924736.
29. Chambergo-Michilot D, Brañez-Condorena A, Falvy-Bockos I, Pacheco-Mendoza J, Benites-Zapata VA. Efficacy of omega-3 supplementation on sertraline continuous therapy to reduce depression or anxiety symptoms: A systematic review and meta-analysis. Psychiatry research. 2021; 296:113652. Epub 2020/12/22. doi: 10.1016/j.psychres.2020.113652. PubMed PMID: 33348198.
30. Chan RJ, Teleni L, McDonald S, Kelly J, Mahony J, Ernst K, et al. Breast cancer nursing interventions and clinical effectiveness: a systematic review. BMJ supportive & palliative care. 2020;10(3):276-86. Epub 2020/06/06. doi: 10.1136/bmjspcare-2019-002120. PubMed PMID: 32499405.
31. Chang YC, Lin CJ, Hsiao YH, Chang YH, Liu SJ, Hsu HY. Therapeutic Effects of BCG Vaccination on Type 1 Diabetes Mellitus: A Systematic Review and Meta-Analysis of Randomized Controlled Trials. Journal of diabetes research. 2020; 2020:8954125. Epub 2020/04/21. doi: 10.1155/2020/8954125. PubMed PMID: 32309449; PubMed Central PMCID: PMCPMC7139880 of this paper.
32. Chastin SFM, Abaraogu U, Bourgois JG, Dall PM, Darnborough J, Duncan E, et al. Effects of Regular Physical Activity on the Immune System, Vaccination and Risk of Community-Acquired Infectious Disease in the General Population: Systematic Review and Meta-Analysis. Sports medicine (Auckland, NZ). 2021:1-14. Epub 2021/04/21. doi: 10.1007/s40279-021-01466-1. PubMed PMID: 33877614; PubMed Central PMCID: PMCPMC8056368 Jennifer Darnborough, Elain Duncan, Jasmien Dumortier, David Jiménez Pavón, Joanna McParland, Nicola J. Roberts and Mark Hamer declare that they have no conflicts of interest relevant to the content of this review
33. Chaudhuri D, Granton D, Wang DX, Burns KEA, Helviz Y, Einav S, et al. High-Flow Nasal Cannula in the Immediate Postoperative Period: A Systematic Review and Meta-analysis. Chest. 2020;158(5):1934-46. Epub 2020/07/03. doi: 10.1016/j.chest.2020.06.038. PubMed PMID: 32615190.
34. Chaudhuri D, Sasaki K, Karkar A, Sharif S, Lewis K, Mammen MJ, et al. Corticosteroids in COVID-19 and non-COVID-19 ARDS: a systematic review and meta-analysis. Intensive care medicine. 2021;47(5):521-37. Epub 2021/04/21. doi: 10.1007/s00134-021-06394-2. PubMed PMID: 33876268; PubMed Central PMCID: PMCPMC8054852.
35. Chen S, Xie B, Tian H, Ding S, Lu C. Traditional Chinese Medicine Yimucao Injection Combined with Western Medicine for Preventing Postpartum Hemorrhage after Cesarean Section: A Systematic Review and Meta-Analysis. Evidence-based complementary and alternative medicine: eCAM. 2019; 2019:7475151. Epub 2019/05/17. doi: 10.1155/2019/7475151. PubMed PMID: 31093297; PubMed Central PMCID: PMCPMC6481111.
36. Chua H, Sardana D, Turner R, Ting G, Ekambaram M. Effectiveness of oral health education methods on oral hygiene in children and adolescents with visual impairment: A systematic review. International journal of paediatric dentistry. 2021. Epub 2021/03/18. doi: 10.1111/ipd.12788. PubMed PMID: 33730385.
37. Cieri-Hutcherson NE, Hutcherson TC, Conway-Habes EE, Burns BN, White NA. Systematic Review of l-glutamine for Prevention of Vaso-occlusive Pain Crisis in Patients with Sickle Cell Disease. Pharmacotherapy. 2019;39(11):1095-104. Epub 2019/09/11. doi: 10.1002/phar.2329. PubMed PMID: 31505045.
38. Coates D, Makris A, Catling C, Henry A, Scarf V, Watts N, et al. A systematic scoping review of clinical indications for induction of labour. PloS one. 2020;15(1): e0228196. Epub 2020/01/30. doi: 10.1371/journal.pone.0228196. PubMed PMID: 31995603; PubMed Central PMCID: PMCPMC6988952.
39. Corrêa LB, Basso MB, Sousa-Pinto B, Coelho Leal S. Oral health effects of botulinum toxin treatment for drooling: a systematic review. Medicina oral, patologia oral y cirugia bucal. 2021;26(2): e172-e80. Epub 2020/12/20. doi: 10.4317/medoral.24101. PubMed PMID: 33340083; PubMed Central PMCID: PMCPMC7980293 the research, authorship, and/or publication of this article.
40. Cortegiani A, Ippolito M, Ingoglia G, Iozzo P, Giarratano A, Einav S. Update I. A systematic review on the efficacy and safety of chloroquine/hydroxychloroquine for COVID-19. Journal of critical care. 2020; 59:176-90. Epub 2020/07/20. doi: 10.1016/j.jcrc.2020.06.019. PubMed PMID: 32683212; PubMed Central PMCID: PMCPMC7351664.
41. Dagan M, Yeung T, Stehli J, Stub D, Walton AS, Duffy SJ. Transcatheter Versus Surgical Aortic Valve Replacement: An Updated Systematic Review and Meta-Analysis with a Focus on Outcomes by Sex. Heart, lung & circulation. 2021;30(1):86-99. Epub 2020/08/01. doi: 10.1016/j.hlc.2020.05.112. PubMed PMID: 32732125.
42. Damiani G, Pacifico A, Chu S, Chi CC. Frequency of phototherapy for treating psoriasis: a systematic review. Italian journal of dermatology and venereology. 2021. Epub 2021/05/14. doi: 10.23736/s2784-8671.21.06975-3. PubMed PMID: 33982550.
43. De Albuquerque Coelho SC, Brito LGO, de Araujo CC, Juliato CRT. Factors associated with unsuccessful pessary fitting in women with symptomatic pelvic organ prolapse: Systematic review and metanalysis. Neurourology and urodynamics. 2020;39(7):1912-21. Epub 2020/07/11. doi: 10.1002/nau.24458. PubMed PMID: 32649024.
44. De Figueiredo Caldas MMV, de Azevedo KPM, de França Nunes AC, de Oliveira VH, Pimenta IDSF, de Araújo IDT, et al. Is rituximab effective for systemic sclerosis? A systematic review and meta-analysis. Advances in Rheumatology. 2021;61(1). doi: 10.1186/s42358-021-00170-y.
45. De Oliveira AB, Ferrisse TM, Basso FG, Fontana CR, Giro EMA, Brighenti FL. A systematic review and meta-analysis of the effect of photodynamic therapy for the treatment of oral mucositis. Photodiagnosis and Photodynamic Therapy. 2021;34. doi: 10.1016/j.pdpdt.2021.102316.
46. De Vega B, Navarro AR, Gibson A, Kalaskar DM. Accuracy of Pedicle Screw Placement Methods in Pediatrics and Adolescents Spinal Surgery: A Systematic Review and Meta-Analysis. Global spine journal. 2021:21925682211003552. Epub 2021/03/19. doi: 10.1177/21925682211003552. PubMed PMID: 33733907.
47. Deakin CD, Morley P, Soar J, Drennan IR. Double (dual) sequential defibrillation for refractory ventricular fibrillation cardiac arrest: A systematic review. Resuscitation. 2020; 155:24-31. doi: 10.1016/j.resuscitation.2020.06.008.
48. Decurcio DA, Rossi-Fedele G, Estrela C, Pulikkotil SJ, Nagendrababu V. Machine-assisted Agitation Reduces Postoperative Pain during Root Canal Treatment: A Systematic Review and Meta-analysis from Randomized Clinical Trials. Journal of endodontics. 2019;45(4):387-93. e2. Epub 2019/03/06. doi: 10.1016/j.joen.2019.01.013. PubMed PMID: 30833095.
49. Dedousis-Wallace A, Drysdale SA, McAloon J, Ollendick TH. Parental and Familial Predictors and Moderators of Parent Management Treatment Programs for Conduct Problems in Youth. Clinical child and family psychology review. 2021;24(1):92-119. doi: 10.1007/s10567-020-00330-4.
50. Del Lhano NC, Ribeiro RA, Martins CC, Assis N, Devito KL. Panoramic versus CBCT used to reduce inferior alveolar nerve paresthesia after third molar extractions: a systematic review and meta-analysis. Dento maxillo facial radiology. 2020;49(4):20190265. Epub 2019/11/15. doi: 10.1259/dmfr.20190265. PubMed PMID: 31724883; PubMed Central PMCID: PMCPMC7213531.
51. Dembrovszky F, Gede N, Szakács Z, Hegyi P, Kiss S, Farkas N, et al. Fecal Microbiota Transplantation May Be the Best Option in Treating Multiple Clostridioides difficile Infection: A Network Meta-Analysis. Infectious diseases and therapy. 2021;10(1):201-11. Epub 2020/10/28. doi: 10.1007/s40121-020-00356-9. PubMed PMID: 33106983. PubMed Central PMCID: PMCPMC7954965.
52. DeMott JM, Slocum GW, Gottlieb M, Peksa GD. Levetiracetam vs. phenytoin as 2nd-line treatment for status epilepticus: A systematic review and meta-analysis. Epilepsy & behavior: E&B. 2020; 111:107286. Epub 2020/07/25. doi: 10.1016/j.yebeh.2020.107286. PubMed PMID: 32707535.
53. Deschodt M, Laurent G, Cornelissen L, Yip O, Zuniga F, Denhaerynck K, et al. Core components and impact of nurse-led integrated care models for home-dwelling older people: A systematic review and metaanalysis. Journal of the American Geriatrics Society. 2020;68(SUPPL 1): S83. doi: 10.1111/jgs.16431.
54. Di Francesco F, De Marco G, Capcha EB, Lanza A, Cristache CM, Vernal R, et al. Patient satisfaction and survival of maxillary overdentures supported by four or six splinted implants: a systematic review with meta-analysis. BMC oral health. 2021;21(1):247. doi: 10.1186/s12903-021-01572-6.
55. Do Rosario VA, Spencer J, Weston-Green K, Charlton K. The Postprandial Effect of Anthocyanins on Cardiovascular Disease Risk Factors: a Systematic Literature Review of High-Fat Meal Challenge Studies. Current Nutrition Reports. 2020. doi: 10.1007/s13668-020-00328-y.
56. Dos Santos CCO, Mecenas P, de Castro Aragón MLS, Normando D. Effects of micro-osteoperforations performed with Propel system on tooth movement, pain/quality of life, anchorage loss, and root resorption: a systematic review and meta-analysis. Progress in orthodontics. 2020;21(1):27. Epub 2020/07/28. doi: 10.1186/s40510-020-00326-4. PubMed PMID: 32715352; PubMed Central PMCID: PMCPMC7383046.
57. Dykukha I, Malessa R, Essner U, Überall MA. Nabiximols in Chronic Neuropathic Pain: A Meta-Analysis of Randomized Placebo-Controlled Trials. Pain medicine (Malden, Mass). 2021;22(4):861-74. Epub 2021/02/10. doi: 10.1093/pm/pnab050. PubMed PMID: 33561282.
58. Elkady DM, Khater AGA, Schwendicke F. Chlorhexidine to improve the survival of ART restorations: A systematic review and meta-analysis. Journal of dentistry. 2020; 103:103491. Epub 2020/10/04. doi: 10.1016/j.jdent.2020.103491. PubMed PMID: 33010387.
59. El-Sakka AI. Medical, non-invasive, and minimally invasive treatment for Peyronie's disease: A systematic review. Andrology. 2021;9(2):511-28. Epub 2020/10/25. doi: 10.1111/andr.12927. PubMed PMID: 33098745.
60. Esagian SM, Ziogas IA, Kosmidis D, Hossain MD, Tannir NM, Msaouel P. Long-term survival outcomes of cytoreductive nephrectomy combined with targeted therapy for metastatic renal cell carcinoma: A systematic review and individual patient data metaanalysis. Journal of Clinical Oncology. 2021;39(6 SUPPL). doi: 10.1200/JCO.2021.39.6-suppl.317.
61. Fan CW, Cieri-Hutcherson N, Hutcherson T. Systematic review of black cohosh (cimicifuga racemosa) for management of polycystic ovary syndrome-related infertility. JACCP Journal of the American College of Clinical Pharmacy. 2020;3(8):1688-9. doi: 10.1002/jac5.1351.
62. Farkhondeh T, Amirabadizadeh A, Aramjoo H, Llorens S, Roshanravan B, Saeedi F, et al. Impact of metformin on cancer biomarkers in non-diabetic cancer patients: A systematic review and meta-analysis of clinical trials. Current Oncology. 2021;28(2):1412-23. doi: 10.3390/curroncol28020134.
63. Farmakis I, Doundoulakis I, Pagiantza A, Zafeiropoulos S, Antza C, Karvounis H, et al. Lipoprotein(a) Reduction with Proprotein Convertase Subtilisin/Kexin Type 9 Inhibitors: A Systematic Review and Meta-analysis. Journal of cardiovascular pharmacology. 2021;77(3):397-407. Epub 2020/12/11. doi: 10.1097/fjc.0000000000000963. PubMed PMID: 33298738.
64. Fawzy El-Sayed KM, Ahmed GM, Abouauf EA, Schwendicke F. Stem/progenitor cell-mediated pulpal tissue regeneration: a systematic review and meta-analysis. International endodontic journal. 2019;52(11):1573-85. Epub 2019/06/25. doi: 10.1111/iej.13177. PubMed PMID: 31232460.
65. Fernández-Rodríguez R, Álvarez-Bueno C, Ferri-Morales A, Torres-Costoso AI, Cavero-Redondo I, Martínez-Vizcaíno V. Pilates method improves cardiorespiratory fitness: A systematic review and meta-analysis. Journal of clinical medicine. 2019;8(11). doi: 10.3390/jcm8111761.
66. Fitzpatrick C, Gillies C, Seidu S, Kar D, Ioannidou E, Davies MJ, et al. Effect of pragmatic versus explanatory interventions on medication adherence in people with cardiometabolic conditions: a systematic review and meta-analysis. BMJ open. 2020;10(7): e036575. Epub 2020/07/28. doi: 10.1136/bmjopen-2019-036575. PubMed PMID: 32709649; PubMed Central PMCID: PMCPMC7380877.
67. Fu C, Wu T, Shu Q, Song A, Jiao Y. Acupuncture therapy on postoperative nausea and vomiting in abdominal operation: A Bayesian network metaanalysis. Medicine. 2020;99(23): e20301. Epub 2020/06/06. doi: 10.1097/md.0000000000020301. PubMed PMID: 32501976; PubMed Central PMCID: PMCPMC7306321.
68. Ghosh A, Mahintamani T, Choudhury S, Sharma N, Das S. The Effectiveness of Non-Benzodiazepine, Non-Barbiturate Medications for Alcohol Withdrawal Syndrome: A Rapid Systematic Review. Alcohol and alcoholism (Oxford, Oxfordshire). 2020. Epub 2020/12/03. doi: 10.1093/alcalc/agaa125. PubMed PMID: 33264386.
69. Ghosn L, Chaimani A, Evrenoglou T, Davidson M, Graña C, Schmucker C, et al. Interleukin‐6 blocking agents for treating COVID‐19: a living systematic review. Cochrane Database of Systematic Reviews. 2021(3). doi: 10.1002/14651858.CD013881. PubMed PMID: CD013881.
70. Giannella M, Malosso P, Scudeller L, Bussini L, Rebuffi C, Gatti M, et al. Quality of care indicators in the MAnageMent of BlOOdstream infections caused by Enterobacteriaceae (MAMBOO-E study): state of the art and research agenda. International journal of antimicrobial agents. 2021;57(4):106320. Epub 2021/03/16. doi: 10.1016/j.ijantimicag.2021.106320. PubMed PMID: 33716177.
71. Glynis A, Foschi F, Kefalou I, Koletsi D, Tzanetakis GN. Regenerative Endodontic Procedures for the Treatment of Necrotic Mature Teeth with Apical Periodontitis. A Systematic Review and Meta-analysis of Randomized Controlled Trials. Journal of endodontics. 2021. doi: 10.1016/j.joen.2021.03.015.
72. Gonçalves C, Abreu S. Sodium and Potassium Intake and Cardiovascular Disease in Older People: A Systematic Review. Nutrients. 2020;12(11). Epub 2020/11/14. doi: 10.3390/nu12113447. PubMed PMID: 33182820; PubMed Central PMCID: PMCPMC7697211.
73. Goodwin J, Saab MM, Dillon CB, Kilty C, McCarthy A, O'Brien M, et al. The use of film-based interventions in adolescent mental health education: A systematic review. Journal of Psychiatric Research. 2021; 137:158-72. doi: 10.1016/j.jpsychires.2021.02.055.
74. Guay J, Kopp S. Peripheral nerve blocks for hip fractures in adults. Cochrane Database of Systematic Reviews. 2020(11). doi: 10.1002/14651858.CD001159.pub3. PubMed PMID: CD001159.
75. Guzman-Pavon MJ, Cavero-Redondo I, Martınez-Vizcaıno V, Fernandez-Rodrıguez R, Reina-Gutierrez S, Alvarez-Bueno C. Effect of Physical Exercise Programs on Myofascial Trigger Points–Related Dysfunctions: A Systematic Review and Meta-analysis. Pain Medicine (United States). 2020;21(11):2986-96. doi: 10.1093/PM/PNAA253.
76. Hariyanto TI, Halim DA, Jodhinata C, Yanto TA, Kurniawan A. Colchicine treatment can improve outcomes of coronavirus disease 2019 (COVID-19): A systematic review and meta-analysis. Clinical and experimental pharmacology & physiology. 2021;48(6):823-30. Epub 2021/03/16. doi: 10.1111/1440-1681.13488. PubMed PMID: 33719081.
77. Hemmingsen B, Metzendorf MI, Richter B. (Ultra-)long-acting insulin analogues for people with type 1 diabetes mellitus. The Cochrane database of systematic reviews. 2021;3(3): Cd013498. Epub 2021/03/05. doi: 10.1002/14651858.CD013498.pub2. PubMed PMID: 33662147; PubMed Central PMCID: PMCPMC8094220 part of the Addressing the Challenge and Constraints of Insulin Sources and Supply (ACCISS) Study.  Statements and conclusions presented in this report are those of the authors alone and do not necessarily reflect the views of the Helmsley Charitable Trust. All references and conclusions are intended for educational and informative purposes and do not constitute an endorsement or recommendation from the Helmsley Charitable Trust. BR: none known. MIM: none known.
78. Ho T, Cheng LJ, Lau Y. School-based interventions for the treatment of childhood obesity: a systematic review, meta-analysis and meta-regression of cluster randomised controlled trials. Public health nutrition. 2021:1-28. doi: 10.1017/S1368980021001117.
79. Hollands GJ, Carter P, Anwer S, King SE, Jebb SA, Ogilvie D, et al. Altering the availability or proximity of food, alcohol, and tobacco products to change their selection and consumption. Cochrane Database of Systematic Reviews. 2019(9). doi: 10.1002/14651858.CD012573.pub3. PubMed PMID: CD012573.
80. Hoy S, Östh J, Pascoe M, Kandola A, Hallgren M. Effects of yoga-based interventions on cognitive function in healthy older adults: A systematic review of randomized controlled trials. Complementary therapies in medicine. 2021; 58:102690. Epub 2021/02/23. doi: 10.1016/j.ctim.2021.102690. PubMed PMID: 33618011.
81. Hu Z, Yang M, Liu Y, Yang Q, Xie H, Peng S, et al. Effect of Huang-Lian Jie-Du Decoction on Glucose and Lipid Metabolism in Type 2 Diabetes Mellitus: A Systematic Review and Meta-Analysis. Frontiers in pharmacology. 2021;12: 648861. Epub 2021/05/18. doi: 10.3389/fphar.2021.648861. PubMed PMID: 33995064; PubMed Central PMCID: PMCPMC8117159.
82. Hyun MK, Lee JW, Ko SH, Hwang JS. Improving Glycemic Control in Type 2 Diabetes Using Mobile Applications and e-Coaching: A Mixed Treatment Comparison Network Meta-Analysis. Journal of diabetes science and technology. 2021:19322968211010153. Epub 2021/05/14. doi: 10.1177/19322968211010153. PubMed PMID: 33980055.
83. Ibarra AMC, Biasotto-Gonzalez DA, Kohatsu EYI, de Oliveira SSI, Bussadori SK, Tanganeli JPC. Photobiomodulation on trigeminal neuralgia: systematic review. Lasers in medical science. 2021;36(4):715-22. Epub 2020/11/22. doi: 10.1007/s10103-020-03198-6. PubMed PMID: 33219445.
84. Ibrahim AM, Zakhary SY, Amin SAW. Calcium hydroxide intracanal medication effects on pain and flare-up: a systematic review and meta-analysis. Restorative dentistry & endodontics. 2020;45(3):e26. Epub 2020/08/26. doi: 10.5395/rde.2020.45. e26. PubMed PMID: 32839707; PubMed Central PMCID: PMCPMC7431935.
85. Inamdar K, Molinini RM, Panibatla ST, Chow JC, Dusing SC. Physical therapy interventions to improve sitting ability in children with or at-risk for cerebral palsy: a systematic review and meta-analysis. Developmental medicine and child neurology. 2020. doi: 10.1111/dmcn.14772.
86. Inhae C, Jiwon K. Effects of mHealth intervention on sexual and reproductive health in emerging adulthood: A systematic review and meta-analysis of randomized controlled trials. International journal of nursing studies. 2021; 119:103949. Epub 2021/05/19. doi: 10.1016/j.ijnurstu.2021.103949. PubMed PMID: 34004469.
87. Jing S, Zhang A, Chen Y, Shen C, Currin-McCulloch J, Zhu C. Mindfulness-based interventions for breast cancer patients in China across outcome domains: a systematic review and meta-analysis of the Chinese literature. Supportive Care in Cancer. 2021. doi: 10.1007/s00520-021-06166-0.
88. Kaptan SK, Dursun BO, Knowles M, Husain N, Varese F. Group EMDR Interventions in Adults and Children: A Systematic Review of Randomised and Non-randomised Trials. Clinical psychology & psychotherapy. 2021. doi: 10.1002/cpp.2549.
89. Karatas N, Dalgic AI. Effects of reflexology on child health: A systematic review. Complementary therapies in medicine. 2020; 50:102364. Epub 2020/05/24. doi: 10.1016/j.ctim.2020.102364. PubMed PMID: 32444044.
90. Keinki C, Momberg A, Clauß K, Bozkurt G, Hertel E, Freuding M, et al. Effect of question prompt lists for cancer patients on communication and mental health outcomes-A systematic review. Patient education and counseling. 2021;104(6):1335-46. Epub 2021/02/18. doi: 10.1016/j.pec.2021.01.012. PubMed PMID: 33593643.
91. Kelleher M, Cro S, Cornelius V, Lodrup Carlsen K, Skjerven H, Rehbinder E, et al. Skin care interventions in infants for preventing eczema and food allergy. 2021(2). PubMed PMID: rayyan-674946048.
92. Kim MS, An MH, Kim WJ, Hwang TH. Comparative efficacy and safety of pharmacological interventions for the treatment of COVID-19: A systematic review and network meta-analysis. PLoS medicine. 2020;17(12): e1003501. Epub 2020/12/31. doi: 10.1371/journal.pmed.1003501. PubMed PMID: 33378357; PubMed Central PMCID: PMCPMC7794037.
93. Kling K, Harder T, Younger Z, Burchard G, Schmidt-Chanasit J, Wichmann O. Vaccination against Japanese encephalitis with IC51: Systematic review on immunogenicity, duration of protection and safety. Journal of travel medicine. 2021;27(2):1-22. doi: 10.1093/JTM/TAAA016. PubMed Central PMCID: PMCBiken.
94. Knösel M, Espinoza-Espinoza GE, Sandoval-Vidal P, Zaror C. Angle class II correction: stepwise mandibular advancement or bite jumping? : A systematic review and meta-analysis of skeletal, dental and condylar effects. Journal of orofacial orthopedics = Fortschritte der Kieferorthopadie: Organ/official journal Deutsche Gesellschaft fur Kieferorthopadie. 2020;81(4):286-300. Epub 2020/05/22. doi: 10.1007/s00056-020-00226-6. PubMed PMID: 32435862.
95. Kotecha P, Light A, Checcucci E, Amparore D, Fiori C, Porpiglia F, et al. Repurposing of drugs for Covid-19: a systematic review and meta-analysis. Panminerva medica. 2020. Epub 2020/10/20. doi: 10.23736/s0031-0808.20.04024-0. PubMed PMID: 33073552.
96. Kotinda APS, Bernardo WM, da Ponte AM, Proença IM, Singh S, de Moura DT, et al. EFFICACY OF INTRAGASTRIC BALLOONS FOR WEIGHT LOSS IN OVERWEIGHT AND OBESE ADULTS: A SYSTEMATIC REVIEW AND META-ANALYSIS OF RANDOMIZED CONTROLLED TRIALS. Gastrointestinal Endoscopy. 2020;91(6): AB228-AB9. doi: 10.1016/j.gie.2020.03.1763.
97. Lam PPY, Sardana D, Ekambaram M, Lee GHM, Yiu CKY. Effectiveness of Pit and Fissure Sealants for Preventing and Arresting Occlusal Caries in Primary Molars: A Systematic Review and Meta-Analysis. The journal of evidence-based dental practice. 2020;20(2):101404. Epub 2020/06/01. doi: 10.1016/j.jebdp.2020.101404. PubMed PMID: 32473795.
98. Lantz JM, Abedi A, Tran F, Cahill R, Kulig K, Michener LA, et al. The Impact of Physical Therapy Following Cervical Spine Surgery for Degenerative Spine Disorders: A Systematic Review. Clinical spine surgery. 2020. Epub 2020/12/17. doi: 10.1097/bsd.0000000000001108. PubMed PMID: 33323701.
99. Larsen RT, Christensen J, Juhl CB, Andersen HB, Langberg H. Physical activity monitors to enhance amount of physical activity in older adults - a systematic review and meta-analysis. European review of aging and physical activity: official journal of the European Group for Research into Elderly and Physical Activity. 2019; 16:7. Epub 2019/05/11. doi: 10.1186/s11556-019-0213-6. PubMed PMID: 31073341; PubMed Central PMCID: PMCPMC6500067.
100. Lata J, do Monte ES, Tucci M, da Ponte AM, Minata MK, Singh S, et al. Propofol versus midazolam sedation for elective endoscopy in patients with cirrhosis. A systematic review and meta-analysis of randomized controlled trials. Gastrointestinal Endoscopy. 2020;91(6): AB284-AB5. doi: 10.1016/j.gie.2020.03.1901.
101. Lawlor ER, Islam N, Bates S, Griffin SJ, Hill AJ, Hughes CA, et al. Third-wave cognitive behaviour therapies for weight management: A systematic review and network meta-analysis. Obesity reviews: an official journal of the International Association for the Study of Obesity. 2020;21(7): e13013. Epub 2020/03/18. doi: 10.1111/obr.13013. PubMed PMID: 32181957; PubMed Central PMCID: PMCPMC7379202.
102. Lee WC, Shieh YS, Liao YF, Lee CH, Huang CS. Long-term maxillary three dimensional changes following maxillary protraction with or without expansion: A systematic review and meta-analysis. Journal of dental sciences. 2021;16(1):168-77. Epub 2021/01/02. doi: 10.1016/j.jds.2020.06.016. PubMed PMID: 33384794; PubMed Central PMCID: PMCPMC7770293.
103. Lee WC, Shieh YS, Liao YF, Lee CH, Huang CS. Long-term maxillary anteroposterior changes following maxillary protraction with or without expansion: A meta-analysis and meta-regression. PloS one. 2021;16(2): e0247027. Epub 2021/02/23. doi: 10.1371/journal.pone.0247027. PubMed PMID: 33617540; PubMed Central PMCID: PMCPMC7899359.
104. Lee CC, Soon YY, Vellayappan B, Leong CN, Koh WY, Tey JCS. Prophylactic irradiation of tracts in patients with malignant pleural mesothelioma: A systematic review and meta-analysis of randomized trials. Critical reviews in oncology/hematology. 2021; 160:103278. Epub 2021/03/07. doi: 10.1016/j.critrevonc.2021.103278. PubMed PMID: 33675903.
105. Lemieux S, Buies A, A FT, Hallet J, Daigle G, Côté F, et al. Effect of Yttrium-90 transarterial radioembolization in patients with non-surgical hepatocellular carcinoma: A systematic review and meta-analysis. PloS one. 2021;16(3): e0247958. Epub 2021/03/05. doi: 10.1371/journal.pone.0247958. PubMed PMID: 33662011; PubMed Central PMCID: PMCPMC7932100.
106. Leong RW, Tan ESJ, Wong SN, Tan KH, Liu CW. Efficacy of erector spinae plane block for analgesia in breast surgery: a systematic review and meta-analysis. Anaesthesia. 2021;76(3):404-13. Epub 2020/07/02. doi: 10.1111/anae.15164. PubMed PMID: 32609389.
107. Li C, Liu Y, Xue D, Chan CWH. Effects of nurse-led interventions on early detection of cancer: A systematic review and meta-analysis. International journal of nursing studies. 2020; 110:103684. doi: 10.1016/j.ijnurstu.2020.103684.
108. Li X, Shen J, Liang J, Zhou X, Yang Y, Wang D, et al. Effect of core-based exercise in people with scoliosis: A systematic review and meta-analysis. Clinical rehabilitation. 2021;35(5):669-80. doi: 10.1177/0269215520975105.
109. Lie SAN, Claessen R, Leung CAW, Merten HA, Kessler P. Non-grafted versus grafted sinus lift procedures for implantation in the atrophic maxilla: a systematic review and meta-analysis of randomized controlled trials. International journal of oral and maxillofacial surgery. 2021. Epub 2021/04/15. doi: 10.1016/j.ijom.2021.03.016. PubMed PMID: 33849784.
110. Lin SN, Su SF, Yeh WT. Meta-analysis: Effectiveness of Comprehensive Geriatric Care for Elderly Following Hip Fracture Surgery. Western journal of nursing research. 2020;42(4):293-305. Epub 2019/07/18. doi: 10.1177/0193945919858715. PubMed PMID: 31313649.
111. Lin CJ, Chang YC, Chang YH, Hsiao YH, Lin HH, Liu SJ, et al. Music Interventions for Anxiety in Pregnant Women: A Systematic Review and Meta-Analysis of Randomized Controlled Trials. Journal of clinical medicine. 2019;8(11). Epub 2019/11/09. doi: 10.3390/jcm8111884. PubMed PMID: 31698704; PubMed Central PMCID: PMCPMC6912569.
112. Llaha F, Zamora-Ros R. The Effects of Polyphenol Supplementation in Addition to Calorie Restricted Diets and/or Physical Activity on Body Composition Parameters: A Systematic Review of Randomized Trials. Frontiers in nutrition. 2020; 7:84. Epub 2020/06/26. doi: 10.3389/fnut.2020.00084. PubMed PMID: 32582757; PubMed Central PMCID: PMCPMC7283923.
113. Lopes-Júnior LC, Bomfim E, Olson K, Neves ET, Silveira DSC, Nunes MDR, et al. Effectiveness of hospital clowns for symptom management in paediatrics: systematic review of randomised and non-randomised controlled trials. BMJ (Clinical research ed). 2020;371:m4290. Epub 2020/12/18. doi: 10.1136/bmj.m4290. PubMed PMID: 33328164; PubMed Central PMCID: PMCPMC7737653 www.icmje.org/coi_disclosure.pdf and declare: support from CAPES for the submitted work; no financial relationships with any organisations that might have an interest in the submitted work in the previous three years; no other relationships or activities that could appear to have influenced the submitted work.
114. Lorenzo-García P, Cavero-Redondo I, Torres-Costoso AI, Guzmán-Pavón MJ, Núñez de Arenas-Arroyo S, Álvarez-Bueno C. Body Weight Support Gait Training for Patients With Parkinson Disease: A Systematic Review and Meta-analyses. Archives of physical medicine and rehabilitation. 2021. Epub 2021/03/09. doi: 10.1016/j.apmr.2021.02.016. PubMed PMID: 33684361.
115. Magalhães TR, Lourenço AL, Gregório H, Queiroga FL. Therapeutic effect of EPA/DHA supplementation in neoplastic and non-neoplastic companion animal diseases: A systematic review. In Vivo. 2021;35(3):1419-36. doi: 10.21873/invivo.12394.
116. Mah J, Pitre T. Oral magnesium supplementation for insomnia in older adults: a Systematic Review & Meta-Analysis. BMC complementary medicine and therapies. 2021;21(1):125. Epub 2021/04/19. doi: 10.1186/s12906-021-03297-z. PubMed PMID: 33865376; PubMed Central PMCID: PMCPMC8053283.
117. Martinez F, Racca A, Rodríguez I, Polyzos NP. Ovarian stimulation for oocyte donation: a systematic review and meta-analysis. Human reproduction update. 2021. Epub 2021/03/21. doi: 10.1093/humupd/dmab008. PubMed PMID: 33742206.
118. Masarwa R, Brunetti VC, Aloe S, Henderson M, Platt RW, Filion KB. The efficacy and safety of metformin for insulin resistance and obesity in children and adolescents: A systematic review and meta-analysis. Pharmacoepidemiology and Drug Safety. 2020;29(SUPPL 3):447-8. doi: 10.1002/pds.5114.
119. Mathew A, Doorenbos AZ, Jang MK, Hershberger PE. Acceptance and commitment therapy in adult cancer survivors: a systematic review and conceptual model. Journal of cancer survivorship: research and practice. 2020. doi: 10.1007/s11764-020-00938-z.
120. Mazuquin B, Moffatt M, Gill P, Selfe J, Rees J, Drew S, et al. Effectiveness of early versus delayed rehabilitation following rotator cuff repair: Systematic review and meta-analyses. PloS one. 2021;16(5): e0252137. Epub 2021/05/29. doi: 10.1371/journal.pone.0252137. PubMed PMID: 34048450.
121. McNerney NA, Losensky MJ, Lash MM, Rozaieski KR, Ortiz D, Garcia AN, et al. Low theoretical fidelity hinders the research on health coaching for opioid reduction: A systematic review of randomized controlled trials. PloS one. 2020;15(10): e0241434. Epub 2020/10/30. doi: 10.1371/journal.pone.0241434. PubMed PMID: 33119705; PubMed Central PMCID: PMCPMC7595321.
122. Mecenas P, Espinosa DG, Cardoso PC, Normando D. Stainless steel or titanium mini implants? The Angle orthodontist. 2020;90(4):587-97. Epub 2020/12/31. doi: 10.2319/081619-536.1. PubMed PMID: 33378494; PubMed Central PMCID: PMCPMC8028470.
123. Melini M, Forni A, Cavallin F, Parotto M, Zanette G. Analgesics for Dental Implants: A Systematic Review. Frontiers in pharmacology. 2020; 11:634963. Epub 2021/02/16. doi: 10.3389/fphar.2020.634963. PubMed PMID: 33584316; PubMed Central PMCID: PMCPMC7872962.
124. Meza-Mauricio J, Furquim CP, Geldres A, Mendoza-Azpur G, Retamal-Valdes B, Moraschini V, et al. Is the use of platelet-rich fibrin effective in the healing, control of pain, and postoperative bleeding in the palatal area after free gingival graft harvesting? A systematic review of randomized clinical studies. Clinical oral investigations. 2021. Epub 2021/04/09. doi: 10.1007/s00784-021-03933-5. PubMed PMID: 33829349.
125. Mheissen S, Khan H, Aldandan M. Limited evidence on differences between fixed appliances and clear aligners regarding pain level. Evidence-based dentistry. 2020;21(4):144-5. Epub 2020/12/20. doi: 10.1038/s41432-020-0140-4. PubMed PMID: 33339979.
126. Migliavaca CB, Stein C, Colpani V, Eibel B, Bgeginski R, Simões MV, et al. High-dose versus low-dose angiotensin converting enzyme inhibitors in heart failure: systematic review and meta-analysis. Open heart. 2020;7(2). Epub 2020/08/21. doi: 10.1136/openhrt-2019-001228. PubMed PMID: 32820054; PubMed Central PMCID: PMCPMC7443275.
127. Mou H, Wong MS, Chien WTP. Effectiveness of dyadic psychoeducational intervention for stroke survivors and family caregivers on functional and psychosocial health: A systematic review and meta-analysis. International journal of nursing studies. 2021; 120:103969. Epub 2021/05/31. doi: 10.1016/j.ijnurstu.2021.103969. PubMed PMID: 34052538.
128. Munir A, Zehnder M, Rechenberg DK. Wound lavage in studies on vital pulp therapy of permanent teeth with carious exposures: A qualitative systematic review. Journal of clinical medicine. 2020;9(4). doi: 10.3390/jcm9040984.
129. Nagendrababu V, Pulikkotil SJ, Suresh A, Veettil SK, Bhatia S, Setzer FC. Efficacy of local anaesthetic solutions on the success of inferior alveolar nerve block in patients with irreversible pulpitis: a systematic review and network meta-analysis of randomized clinical trials. International endodontic journal. 2019;52(6):779-89. Epub 2019/01/15. doi: 10.1111/iej.13072. PubMed PMID: 30638269.
130. Nagendrababu V, Pulikkotil SJ, Jinatongthai P, Veettil SK, Teerawattanapong N, Gutmann JL. Efficacy and Safety of Oral Premedication on Pain after Nonsurgical Root Canal Treatment: A Systematic Review and Network Meta-analysis of Randomized Controlled Trials. Journal of endodontics. 2019;45(4):364-71. Epub 2019/02/10. doi: 10.1016/j.joen.2018.10.016. PubMed PMID: 30737050.
131. Nagendrababu V, Aly Ahmed HM, Pulikkotil SJ, Veettil SK, Dharmarajan L, Setzer FC. Anesthetic Efficacy of Gow-Gates, Vazirani-Akinosi, and Mental Incisive Nerve Blocks for Treatment of Symptomatic Irreversible Pulpitis: A Systematic Review and Meta-analysis with Trial Sequential Analysis. Journal of endodontics. 2019;45(10):1175-83.e3. Epub 2019/09/26. doi: 10.1016/j.joen.2019.06.008. PubMed PMID: 31551112.
132. Nath S, Pulikkotil S, Dharmarajan L, Arunachalam M, Jing K. Effect of locally delivered doxycycline as an adjunct to scaling and root planing in the treatment of periodontitis in smokers: A systematic review of randomized controlled trials with meta-analysis and trial sequential analysis. Dental research journal. 2020;17(4):235-43. doi: 10.4103/1735-3327.292059.
133. Nauwelaers AK, Van Oost L, Peers K. Evidence for the use of PRP in chronic midsubstance Achilles’s tendinopathy: A systematic review with meta-analysis. Foot and ankle surgery: official journal of the European Society of Foot and Ankle Surgeons. 2020. Epub 2020/08/17. doi: 10.1016/j.fas.2020.07.009. PubMed PMID: 32798020.
134. Ndunda PM, Vindhyal MR, Muutu TM, Fanari Z. Clinical Outcomes of Sentinel Cerebral Protection System Use During Transcatheter Aortic Valve Replacement: A Systematic Review and Meta-Analysis. Cardiovascular Revascularization Medicine. 2020;21(6):717-22. doi: 10.1016/j.carrev.2019.04.023.
135. Ndunda PM, Vindhyal M, Khayyat S, Muutu T, Fanari Z. Dual-filter cerebral protection device for stroke prevention during transcatheter aortic valve replacement: An updated meta-analysis. Arteriosclerosis, Thrombosis, and Vascular Biology. 2019;39. doi: 10.1161/atvb.39.suppl-1.637.
136. Nicolodi GV, Della Méa Plentz R, Righi NC, Stein C. Effects of aerobic exercise on patients with pre-dialysis chronic kidney disease: a systematic review of randomized controlled trials. Disability and rehabilitation. 2021:1-10. Epub 2021/05/26. doi: 10.1080/09638288.2021.1900929. PubMed PMID: 34033723.
137. Nourredine M, Jurek L, Angerville B, Longuet Y, de Ternay J, Derveaux A, et al. Use of Topiramate in the Spectrum of Addictive and Eating Disorders: A Systematic Review Comparing Treatment Schemes, Efficacy, and Safety Features. CNS drugs. 2021;35(2):177-213. doi: 10.1007/s40263-020-00780-y.
138. Ocskay K, Kanjo A, Gede N, Szakács Z, Pár G, Erőss B, et al. Uncertainty in the impact of liver support systems in acute-on-chronic liver failure: a systematic review and network meta-analysis. Annals of intensive care. 2021;11(1):10. Epub 2021/01/20. doi: 10.1186/s13613-020-00795-0. PubMed PMID: 33462764; PubMed Central PMCID: PMCPMC7813174.
139. Oliveira LM, Pazinatto J, Batistin Zanatta F. Are oral hygiene instructions with aid of plaque-disclosing methods effective in improving self-performed dental plaque control? A systematic review of randomized controlled trials. International journal of dental hygiene. 2021. doi: 10.1111/idh.12491.
140. Ong AM, Kang K, Weiler HA, Morin SN. Fermented Milk Products and Bone Health in Postmenopausal Women: A Systematic Review of Randomized Controlled Trials, Prospective Cohorts, and Case-Control Studies. Advances in nutrition (Bethesda, Md). 2020;11(2):251-65. Epub 2019/10/12. doi: 10.1093/advances/nmz108. PubMed PMID: 31603185; PubMed Central PMCID: PMCPMC7442363.
141. Oteri V, Martinelli A, Crivellaro E, Gigli F. The impact of preoperative anxiety on patients undergoing brain surgery: a systematic review. Neurosurgical review. 2021. Epub 2021/02/21. doi: 10.1007/s10143-021-01498-1. PubMed PMID: 33608828.
142. Ouyang RG, Yang CN, Qu YL, Koduri MP, Chien CW. Effectiveness of hand-arm bimanual intensive training on upper extremity function in children with cerebral palsy: A systematic review. European journal of paediatric neurology: EJPN: official journal of the European Paediatric Neurology Society. 2020; 25:17-28. Epub 2020/01/07. doi: 10.1016/j.ejpn.2019.12.017. PubMed PMID: 31902688.
143. Owen VS, Rosgen BK, Cherak SJ, Ferland A, Stelfox HT, Fiest KM, et al. Adverse events associated with administration of vasopressor medications through a peripheral intravenous catheter: a systematic review and meta-analysis. Critical care (London, England). 2021;25(1):146. Epub 2021/04/18. doi: 10.1186/s13054-021-03553-1. PubMed PMID: 33863361; PubMed Central PMCID: PMCPMC8050944.
144. Packer TW, Naqvi AZ, Edwards TC. Intramedullary tibial nailing using infrapatellar and suprapatellar approaches: A systematic review and meta-analysis. Injury. 2021;52(3):307-15. Epub 2020/10/02. doi: 10.1016/j.injury.2020.09.047. PubMed PMID: 32998824.
145. Palsson TS, Travers MJ, Rafn T, Ingemann-Molden S, Caneiro JP, Christensen SW. The use of posture-correcting shirts for managing musculoskeletal pain is not supported by current evidence - A scoping review of the literature. Scandinavian Journal of Pain. 2019. doi: 10.1515/sjpain-2019-0005.
146. Paludan-Müller AS, Boesen K, Klerings I, Jørgensen KJ, Munkholm K. Hand cleaning with ash for reducing the spread of viral and bacterial infections: a rapid review. The Cochrane database of systematic reviews. 2020;4(4): Cd013597. Epub 2020/04/29. doi: 10.1002/14651858.Cd013597. PubMed PMID: 32343408; PubMed Central PMCID: PMCPMC7192094 known Karsten Juhl Jørgensen: none known Klaus Munkholm: none known.
147. Papadopoulou C, Karamani I, Gkourtsogianni S, Seremidi K, Kloukos D. A systematic review on the effectiveness of organic unprocessed products in controlling gingivitis in patients undergoing orthodontic treatment with fixed appliances. Clinical and experimental dental research. 2021. Epub 2021/05/05. doi: 10.1002/cre2.417. PubMed PMID: 33942562.
148. Pérez Ramírez N, Rozbaczylo Fuster C, Nahuelhual Cares P. [Effectiveness of the use of standing devices in the prevention of hip dislocation in children and adolescents with spastic cerebral palsy, GMFCS III, IV and V. A systematic review]. Rehabilitacion. 2019;53(3):169-80. Epub 2019/08/03. doi: 10.1016/j.rh.2019.05.001. PubMed PMID: 31370944.
149. Piccoli GF, Mesquita LA, Stein C, Aziz M, Zoldan M, Degobi NAH, et al. Do GLP-1 Receptor Agonists Increase
150. Pitsillides A, Stasinopoulos D, Giannakou K. The effects of cognitive behavioural therapy delivered by physical therapists in knee osteoarthritis pain: A systematic review and meta-analysis of randomized controlled trials. Journal of bodywork and movement therapies. 2021; 25:157-64. Epub 2021/03/15. doi: 10.1016/j.jbmt.2020.11.002. PubMed PMID: 33714488.
151. Previtali D, Di Laura Frattura G, Delcogliano M, Deabate L, Filardo G, Candrian C. The long-lasting effects of “placebo injections” in knee oste-oarthritis: A meta-analysis (8367). Swiss Medical Weekly. 2020;150(SUPPL 244):27S.
152. Proenca IM, Bernardo WM, da Ponte AM, Matsubayashi CO, Kotinda APS, Flor MM, et al. Fecal microbiota transplantation for metabolic syndrome and obesity: a sytematic review and meta-analysis based on randomized clinical trials. Gastroenterology. 2020;158(6) :S-480-S-1. doi: 10.1016/S0016-5085(20)31880-1.
153. Qin C, Jiang Y, Lin C, Li A, Liu J. Perioperative dexmedetomidine administration to prevent delirium in adults after non-cardiac surgery: A systematic review and meta-analysis. Journal of clinical anesthesia. 2021; 73:110308. Epub 2021/05/01. doi: 10.1016/j.jclinane.2021.110308. PubMed PMID: 33930679.
154. Qiu X, Gao Y, Zhang Z, Cheng S, Zhang S. Fire Acupuncture versus conventional acupuncture to treat spasticity after stroke: A systematic review and meta-analysis. PloS one. 2021;16(4): e0249313. Epub 2021/04/10. doi: 10.1371/journal.pone.0249313. PubMed PMID: 33836008; PubMed Central PMCID: PMCPMC8034732.
155. Ramli FF, Azizi MH, Syed Hashim SA. Treatments of Sexual Dysfunction in Opioid Substitution Therapy Patients: A Systematic Review and Meta-Analysis. International journal of medical sciences. 2021;18(11):2372-80. Epub 2021/05/11. doi: 10.7150/ijms.57641. PubMed PMID: 33967614; PubMed Central PMCID: PMCPMC8100642.
156. Rayanakorn A, Ser HL, Pusparajah P, Chan KG, Goh BH, Khan TM, et al. Comparative efficacy of antibiotic(s) alone or in combination of corticosteroids in adults with acute bacterial meningitis: A systematic review and network meta-analysis. PloS one. 2020;15(5): e0232947. Epub 2020/05/30. doi: 10.1371/journal.pone.0232947. PubMed PMID: 32469959; PubMed Central PMCID: PMCPMC7259733 interests: L-HL received External Industry Grants from Biotek Abadi Sdn Bhd. There are no patents, products in development or marketed products associated with this research to declare. This does not alter our adherence to PLOS ONE policies on sharing data and materials.
157. Reina-Gutiérrez S, Torres-Costoso A, Martínez-Vizcaíno V, de Arenas-Arroyo SN, Fernández-Rodríguez R, Pozuelo-Carrascosa DP. Effectiveness of pulmonary rehabilitation in interstitial lung disease including coronavirus diseases: a systematic review and meta-analysis. Archives of physical medicine and rehabilitation. 2021. Epub 2021/05/02. doi: 10.1016/j.apmr.2021.03.035. PubMed PMID: 33932361.
158. Ribeiro PRS, Schlindwein AD. Benzodiazepine deprescription strategies in chronic users: a systematic review. Family practice. 2021. Epub 2021/04/29. doi: 10.1093/fampra/cmab017. PubMed PMID: 33907803.
159. Roh JA, Kim KI, Jung HJ. The efficacy of manual therapy for chronic obstructive pulmonary disease: A systematic review. PloS one. 2021;16(5): e0251291. Epub 2021/05/19. doi: 10.1371/journal.pone.0251291. PubMed PMID: 34003822; PubMed Central PMCID: PMCPMC8130973.
160. Rosewall T, Feuz C, Bayley A. Cannabis and Radiation Therapy: A Scoping Review of Human Clinical Trials. Journal of medical imaging and radiation sciences. 2020;51(2):342-9. Epub 2020/04/07. doi: 10.1016/j.jmir.2020.01.007. PubMed PMID: 32249134.
161. Rossi-Fedele G, Kahler B, Venkateshbabu N. Limited Evidence Suggests Benefits of Single Visit Revascularization Endodontic Procedures - A Systematic Review. Brazilian dental journal. 2019;30(6):527-35. Epub 2019/12/05. doi: 10.1590/0103-6440201902670. PubMed PMID: 31800745.
162. Rutili V, Mrakic G, Nieri M, Franceschi D, Pierleoni F, Giuntini V, et al. Dento-skeletal effects produced by rapid versus slow maxillary expansion using fixed jackscrew expanders: a systematic review and meta-analysis. European journal of orthodontics. 2021. Epub 2021/05/06. doi: 10.1093/ejo/cjaa086. PubMed PMID: 33950178.
163. Saito T, Izawa KP. Effectiveness and feasibility of home-based telerehabilitation for community-dwelling elderly people in Southeast Asian countries and regions: a systematic review. Aging clinical and experimental research. 2021:1-13. Epub 2021/03/26. doi: 10.1007/s40520-021-01820-3. PubMed PMID: 33765258; PubMed Central PMCID: PMCPMC7993072.
164. Santos M, Torres D, Cardoso PC, Pandis N, Flores-Mir C, Medeiros R, et al. Are cloth masks a substitute to medical masks in reducing transmission and contamination? A systematic review. Brazilian oral research. 2020;34: e123. Epub 2020/11/05. doi: 10.1590/1807-3107bor-2020.vol34.0123. PubMed PMID: 33146319.
165. Santos JMLG, Ribeiro Ó, Jesus LMT, Matos MAC. Interventions to Prevent Aspiration Pneumonia in Older Adults: An Updated Systematic Review. Journal of speech, language, and hearing research: JSLHR. 2021;64(2):464-80. doi: 10.1044/2020_JSLHR-20-00123.
166. Schardong J, Stein C, Della Méa Plentz R. Neuromuscular Electrical Stimulation in Chronic Kidney Failure: A Systematic Review and Meta-analysis. Archives of physical medicine and rehabilitation. 2020;101(4):700-11. doi: 10.1016/j.apmr.2019.11.008.
167. Scheufele F, Schirren R, Friess H, Reim D. Selective decontamination of the digestive tract in upper gastrointestinal surgery: systematic review with meta-analysis of randomized clinical trials. BJS open. 2020;4(6):1015-21. Epub 2020/08/05. doi: 10.1002/bjs5.50332. PubMed PMID: 32749070; PubMed Central PMCID: PMCPMC7709368.
168. Shah SZA, Karam JA, Zeb A, Ullah R, Shah A, Haq IU, et al. Movement is Improvement: The Therapeutic Effects of Exercise and General Physical Activity on Glycemic Control in Patients with Type 2 Diabetes Mellitus: A Systematic Review and Meta-Analysis of Randomized Controlled Trials. Diabetes therapy: research, treatment and education of diabetes and related disorders. 2021;12(3):707-32. Epub 2021/02/07. doi: 10.1007/s13300-021-01005-1. PubMed PMID: 33547579; PubMed Central PMCID: PMCPMC7947168.
169. Sharma VK, Shukla NK, Chaturvedi TP, Singh S. Variables to predict spontaneous eruption of palatally displaced permanent canine after interceptive extraction of primary canine: A systematic review and meta-analysis. International orthodontics. 2021;19(1):25-36. Epub 2020/12/24. doi: 10.1016/j.ortho.2020.11.004. PubMed PMID: 33353824.
170. Shrestha S, Zhao J, Yang C, Zhang J. Relative efficacy and safety of iguratimod monotherapy for the treatment of patients with rheumatoid arthritis: a systematic review and meta-analysis. Clinical rheumatology. 2020;39(7):2139-50. Epub 2020/02/23. doi: 10.1007/s10067-020-04986-9. PubMed PMID: 32076916.
171. Singh S, Singh S, Thangaswamy A, Thangaraju P, Varthya SB. Efficacy and safety of Risankizumab in moderate to severe psoriasis: A systematic review and meta-analysis. Dermatologic therapy. 2021;34(1): e14487. Epub 2020/11/04. doi: 10.1111/dth.14487. PubMed PMID: 33140468.
172. Siritho S, Nopsopon T, Pongpirul K. Therapeutic plasma exchange vs conventional treatment with intravenous high dose steroid for neuromyelitis optica spectrum disorders (NMOSD): a systematic review and meta-analysis. Journal of neurology. 2020. Epub 2020/10/11. doi: 10.1007/s00415-020-10257-z. PubMed PMID: 33037886.
173. Song X, Hallensleben C, Zhang W, Jiang Z, Shen H, Gobbens RJJ, et al. Blended Self-Management Interventions to Reduce Disease Burden in Patients With Chronic Obstructive Pulmonary Disease and Asthma: Systematic Review and Meta-analysis. Journal of medical Internet research. 2021;23(3): e24602. Epub 2021/04/01. doi: 10.2196/24602. PubMed PMID: 33788700; PubMed Central PMCID: PMCPMC8047793.
174. Soni H, Kumar MP, Mishra S, Bellam BL, Singh H, Mandavdhare HS, et al. Risk of hepatitis with various reintroduction regimens of anti-tubercular therapy: a systematic review and network meta-analysis. Expert review of anti-infective therapy. 2020;18(2):171-9. Epub 2020/01/11. doi: 10.1080/14787210.2020.1714436. PubMed PMID: 31923369.
175. Stroehlein JK, Wallqvist J, Iannizzi C, Mikolajewska A, Metzendorf MI, Benstoem C, et al. Vitamin D supplementation for the treatment of COVID‐19: a living systematic review. Cochrane Database of Systematic Reviews. 2021(5). doi: 10.1002/14651858.CD015043. PubMed PMID: CD015043.
176. Su CL, Tam KW, Fang TP, Chiang LL, Chen HC. Effects of pulmonary rehabilitation program on amyotrophic lateral sclerosis: A meta-analysis of randomized controlled trials. NeuroRehabilitation. 2021;48(3):255-65. Epub 2021/04/06. doi: 10.3233/nre-210052. PubMed PMID: 33814477.
177. Sugianto JA, Hadipranata T, Lazarus G, Amrullah AH. Proximal fibular osteotomy for the management of medial compartment knee osteoarthritis: A systematic review and meta-analysis. Knee. 2021; 28:169-85. doi: 10.1016/j.knee.2020.11.020.
178. Sun S, Wang J, Wang J, Wang F, Xia H, Yao S. Fetal and Maternal Responses to Dexmedetomidine Intrathecal Application During Cesarean Section: A Meta-Analysis. Medical science monitor: international medical journal of experimental and clinical research. 2020;26: e918523. Epub 2020/01/30. doi: 10.12659/msm.918523. PubMed PMID: 31995551; PubMed Central PMCID: PMCPMC7001518.
179. Sun Q, Xu S, Guo S, You Y, Xia R, Liu J. Effects of Combined Physical Activity and Cognitive Training on Cognitive Function in Older Adults with Subjective Cognitive Decline: A Systematic Review and Meta-Analysis of Randomized Controlled Trials. Evidence-based Complementary and Alternative Medicine. 2021;2021. doi: 10.1155/2021/8882961.
180. Susai SR, Mongan D, Focking M, Cotter D. The role of Omega-3 fatty acids on functional outcome in Psychosis. Brain and Neuroscience Advances. 2019; 3:395-6. doi: 10.1177/2398212819855490.
181. Tan CH, Wu AG, Sia CH, Leow AS, Chan BP, Sharma VK, et al. Cilostazol for secondary stroke prevention: systematic review and meta-analysis. Stroke and vascular neurology. 2021. doi: 10.1136/svn-2020-000737.
182. Thangaraju P, Varthya SB, Venkatesan S, Tamilselvan T, Singh S. Efficacy and safety of sufentanil sublingual tablet system in postoperative pain management: a systematic review and meta-analysis. BMJ supportive & palliative care. 2021. Epub 2021/03/04. doi: 10.1136/bmjspcare-2020-002693. PubMed PMID: 33653734.
183. Tovo CV, Ahlert M, Panke C, de Mattos Â Z, de Mattos AA. Treatment of hepatitis B virus infection in chronic infection with HBeAg-positive adult patients (immunotolerant patients): a systematic review. European journal of gastroenterology & hepatology. 2021;33(5):605-9. Epub 2020/09/19. doi: 10.1097/meg.0000000000001907. PubMed PMID: 32947420.
184. Tsai SHL, Chien RS, Lichter K, Alharthy R, Alvi MA, Goyal A, et al. Teriparatide and bisphosphonate use in osteoporotic spinal fusion patients: a systematic review and meta-analysis. Archives of Osteoporosis. 2020;15(1). doi: 10.1007/s11657-020-00738-z.
185. Tsai YS, Hsu LW, Wu MS, Chen KH, Kang YN. Effects of Tranexamic Acid on Hemoptysis: A Systematic Review and Meta-Analysis of Randomized Controlled Trials. Clinical drug investigation. 2020;40(9):789-97. Epub 2020/07/15. doi: 10.1007/s40261-020-00946-y. PubMed PMID: 32661913.
186. Tsapas A, Karagiannis T, Kakotrichi P, Avgerinos I, Mantsiou C, Tousinas G, Manolopoulos A, Liakos A, Malandris K, Matthews DR, Bekiari E. [Comparative efficacy of glucose-lowering medications on body weight and blood pressure in patients with type 2 diabetes: A systematic review and network meta-analysis.](https://pubmed.ncbi.nlm.nih.gov/34047443/) Diabetes Obes Metab. 2021 Sep;23(9):2116-2124. doi: 10.1111/dom.14451. Epub 2021 Jun 15. PMID: 34047443
187. Tuohy GP, Megaw R. A systematic review and meta-analyses of interventional clinical trial studies for gene therapies for the inherited retinal degenerations (Irds). Biomolecules. 2021;11(5). doi: 10.3390/biom11050760.
188. Ujhelyi Gomez K, Goodwin L, Jackson L, Jones A, Chisholm A, Rose AK. Are psychosocial interventions effective in reducing alcohol consumption during pregnancy and motherhood? A systematic review and meta-analysis. Addiction (Abingdon, England). 2020. Epub 2020/10/18. doi: 10.1111/add.15296. PubMed PMID: 33067887.
189. Vadalà G, Russo F, De Salvatore S, Cortina G, Albo E, Papalia R, et al. Physical Activity for the Treatment of Chronic Low Back Pain in Elderly Patients: A Systematic Review. Journal of clinical medicine. 2020;9(4). Epub 2020/04/09. doi: 10.3390/jcm9041023. PubMed PMID: 32260488; PubMed Central PMCID: PMCPMC7230826.
190. Van Dijk M, Vreven J, Deschodt M, Verheyden G, Tournoy J, Flamaing J. Can in-hospital or post discharge caregiver involvement increase functional performance of older patients? A systematic review. BMC geriatrics. 2020;20(1):362. Epub 2020/09/24. doi: 10.1186/s12877-020-01769-4. PubMed PMID: 32962653; PubMed Central PMCID: PMCPMC7510152.
191. Van Truong P, Wulan Apriliyasari R, Lin MY, Chiu HY, Tsai PS. Effects of self-management programs on blood pressure, self-efficacy, medication adherence and body mass index in older adults with hypertension: Meta-analysis of randomized controlled trials. International journal of nursing practice. 2021;27(2): e12920. Epub 2021/02/17. doi: 10.1111/ijn.12920. PubMed PMID: 33590947.
192. Wali S, Balfoussia D, Touqmatchi D, Quinn S. Misoprostol for open myomectomy: a systematic review and meta-analysis of randomised control trials. BJOG: an international journal of obstetrics and gynaecology. 2021;128(3):476-83. Epub 2020/07/03. doi: 10.1111/1471-0528.16389. PubMed PMID: 32613769.
193. Wamkpah NS, Jeanpierre L, Lieu JEC, Del Toro D, Simon LE, Chi JJ. Physical Therapy for Iatrogenic Facial Paralysis: A Systematic Review. JAMA otolaryngology-- head & neck surgery. 2020;146(11):1065-72. Epub 2020/09/25. doi: 10.1001/jamaoto.2020.3049. PubMed PMID: 32970128; PubMed Central PMCID: PMCPMC8048107.
194. Wang C, Li G, Zheng L, Meng X, Meng Q, Wang S, et al. Effects of music intervention on sleep quality of older adults: A systematic review and meta-analysis. Complementary therapies in medicine. 2021; 59:102719. Epub 2021/04/18. doi: 10.1016/j.ctim.2021.102719. PubMed PMID: 33864907.
195. Weissheimer T, Silva E, Pinto KP, Só GB, Rosa RA, Só MVR. Do orthodontic tooth movements induce pulp necrosis? A systematic review. International endodontic journal. 2021. Epub 2021/03/30. doi: 10.1111/iej.13523. PubMed PMID: 33780015.
196. Wen B, Wang Y, Zhang C, Fu Z. Effect of stellate ganglion block on postoperative recovery of gastrointestinal function in patients undergoing surgery with general anaesthesia: a meta-analysis. BMC surgery. 2020;20(1):284. Epub 2020/11/18. doi: 10.1186/s12893-020-00943-0. PubMed PMID: 33198732; PubMed Central PMCID: PMCPMC7670678.
197. Witt KG, Hetrick SE, Rajaram G, Hazell P, Taylor Salisbury TL, Townsend E, et al. Interventions for self‐harm in children and adolescents. Cochrane Database of Systematic Reviews. 2021(3). doi: 10.1002/14651858.CD013667.pub2. PubMed PMID: CD013667.
198. Witt KG, Hetrick SE, Rajaram G, Hazell P, Taylor Salisbury TL, Townsend E, et al. Psychosocial interventions for self‐harm in adults. Cochrane Database of Systematic Reviews. 2021(4). doi: 10.1002/14651858.CD013668.pub2. PubMed PMID: CD013668.
199. Wong YJ. Does oral Nonsteroidal Anti-inflammatory Drugs (NSAIDs) premedication in patients with irreversible pulpitis increase the success rate of inferior alveolar nerve block? Evidence-based dentistry. 2019;20(1):20-1. Epub 2019/03/25. doi: 10.1038/s41432-019-0014-9. PubMed PMID: 30903123.
200. Woon EV, Day A, Bracewell-Milnes T, Male V, Johnson M. Immunotherapy to improve pregnancy outcome in women with abnormal natural killer cell levels/activity and recurrent miscarriage or implantation failure: A systematic review and meta-analysis. Journal of reproductive immunology. 2020; 142:103189. Epub 2020/09/06. doi: 10.1016/j.jri.2020.103189. PubMed PMID: 32889304.
201. Xu Y, Ye H, Zhu Y, Du S, Xu G, Wang Q. The efficacy of mobile health in alleviating risk factors related to the occurrence and development of coronary heart disease: A systematic review and meta-analysis. Clinical cardiology. 2021;44(5):609-19. Epub 2021/03/17. doi: 10.1002/clc.23596. PubMed PMID: 33724494; PubMed Central PMCID: PMCPMC8119799.
202. Zaffagnini S, Poggi A, Reale D, Andriolo L, Flanigan DC, Filardo G. Biologic Augmentation Reduces the Failure Rate of Meniscal Repair: A Systematic Review and Meta-analysis. Orthopaedic journal of sports medicine. 2021;9(2):2325967120981627. Epub 2021/03/13. doi: 10.1177/2325967120981627. PubMed PMID: 33709004; PubMed Central PMCID: PMCPMC7907660.
203. Zee MJM, Robben BJ, Zuurmond RG, Bulstra SK, Diercks RL. Effect of ACL Reconstruction on Range of Tibial Rotation: A Systematic Review of Current Literature and a Recommendation for a Standard Measuring Protocol. Orthopaedic journal of sports medicine. 2020;8(8). doi: 10.1177/2325967120945967.
204. Zhang D, Lyu JT, Zhang B, Zhang XM, Jiang H, Lin ZJ. Comparative efficacy, safety and cost of oral Chinese patent medicines for rheumatoid arthritis: a Bayesian network meta-analysis. BMC complementary medicine and therapies. 2020;20(1):210. Epub 2020/07/08. doi: 10.1186/s12906-020-03004-4. PubMed PMID: 32631398; PubMed Central PMCID: PMCPMC7339567.
205. Zhang B, Huang X, Huo S, Zhang C, Cen X, Zhao Z. Effect of photobiomodulation therapy on mini-implant stability: a systematic review and meta-analysis. Lasers in medical science. 2021. Epub 2021/03/05. doi: 10.1007/s10103-021-03281-6. PubMed PMID: 33660109.
206. Zhang Q, Schwade M, Smith Y, Wood R, Young L. Exercise-based interventions for post-stroke social participation: A systematic review and network meta-analysis. International journal of nursing studies. 2020; 111:103738. doi: 10.1016/j.ijnurstu.2020.103738.
207. Zheng C, Zhang X, Sheridan S, Ho RST, Sit CHP, Huang Y, et al. Effect of sedentary behavior interventions on vascular function in adults: A systematic review and meta-analysis. Scandinavian journal of medicine & science in sports. 2021. doi: 10.1111/sms.13947.
208. Zymperdikas VF, Yavropoulou MP, Kaklamanos EG, Papadopoulos MA. Bisphosphonates as Supplement to Dental Treatment: A Network Meta-Analysis. Journal of dental research. 2021;100(4):341-51. Epub 2020/11/20. doi: 10.1177/0022034520972945. PubMed PMID: 33208008.

**Characteristics of included systematic reviews**

| **Author, Year** | **Journal** | **Medical area** | **First author's Country** | **Condition** | **Intervention** | **Comparator** | **Total outcomes** | **Primary outcomes** | **Number of included studies (RCT)** | **RCT only** | **Certainty of evidence**  **GRADE** | **Journal Quartile** | **Amstar 2** |
| --- | --- | --- | --- | --- | --- | --- | --- | --- | --- | --- | --- | --- | --- |
| Abraham, 2021 | Cochrane Database of Systematic Reviews | Rehabilitation/physical therapy | UK | Adults (>18 years) with heart valve surgery (heart valve replacement or repair) | Exercise-based Cardiac rehabilitation interventions | No exercise | 8 | 3 | 6 (6) | Yes | Yes | 1 | Moderate |
| Afonso, 2020 | International Journal of Sports Medicine | Rehabilitation/physical therapy | Portugal | Healthy humans | Any intervention using agility ladders | No training using agility ladders | 8 | 4 | 5 | Yes | No | 2 | Critically low |
| Afonso, 2021 | Frontiers in Physiology | Rehabilitation/physical therapy | Portugal | Humans | Stretching immediately after any type of exercise session | Passive recovery or alternative recovery protocols | 10 | NOT STATED | 11 | Yes | Yes | 1 | Critically low |
| AÏem, 2020 | International Journal of Paediatric Dentistry | Oral/dental | France | Children with primary teeth affected by deep carious lesions | Selective caries removal or Stepwise caries  removal | Complete  caries removal | 9 | 6 | 8 | Yes | No | 2 | Critically low |
| Alakttash, 2019 | Angle Orthodontist | Oral/dental | UK | Patients undergoing treatment with fixed orthodontic appliances with full upper and lower arch bracketing | Adhesive precoated brackets | Operator-coated brackets | 3 | NOT STATED | 5 | Yes | No | 3 | Low |
| Al-Dboush, 2021 | Orthodontics & Craniofacial Research | Oral/dental | Canada | Patients of any age who were treated with fixed orthodontic appliances or aligners | Intraoral non-pharmacological non-surgical adjunctive intervention during the fixed orthodontic treatment or treatment with aligners | Not receive intervention | 6 | NOT STATED | 10 (8) | No | Yes | 4 | Critically low |
| Almouzain, 2021 | Multiple Sclerosis Journal | Neurology | UK | Adults with confirmed relapsing remitting multiple sclerosis diagNosis | Switching disease modifying drugs | Use of disease modifying drugs only | 1 | 1 | 7(1) | No | No | 1 | Critically low |
| Al-Saeedi, 2021 | Plos Neglected Tropical Diseases | Surgery | Germany | Patient with hepatic Cystic echinococcosis | Endocystectomy | No treatment | 3 | 1 | 54(2) | No | No | 1 | Low |
| Ang, 2020 | Complementary Therapies in Medicine | Alternative med/acupuncture | Korea | Adults with diabetic retinopathy | Acupuncture for the treatment of diabetic retinopathy | Standard medication, no treatment, standard care, sham acupuncture | 4 | NOT STATED | 6 (6) | Yes | Yes | 2 | Critically low |
| Annoni, 2021 | Resuscitation | Emergency/anestesiology | Belgium | Adult Cardiac arrest patients | Intra arrest therapeutic hypothermia | Standard | 5 | 2 | 8 (5) | No | Yes | 1 | Critically low |
| Apessos, 2021 | BMC Pulmonary Medicine | Oral/dental | Greece | Chronic obstructive  pulmonary disease diagnosis | Non-surgical or surgical periodontal therapy | No treatment | 3 | 1 | 7 (3) | No | Yes | 2 | Low |
| Arn 2020 | American Journal of Orthodontics and Dentofacial Orthopedics | Oral/dental | Switzerland | Orthodontic treatment | All kinds of fixed retainers | Patients without fixed retainers | 11 | 3 | 29 (11) | No | No | 2 | Critically low |
| Askland, 2020 | Cochrane Database of Systematic Reviews | Psychology | UK | Adults with obstructive sleep apnoea | Educational interventions +Continuous Positive Airway Pressure (CPAP); supportive interventions + CPAP; behavioural interventions + CPAP | Usual care + CPAP | 2 | NOT STATED | 41 | No | Yes | 1 | Moderate |
| Ávila-Curiel, 2020 | Revista Internacional de Acupuntura | Alternative med/acupuncture | México | Patients with pain due to temporomandibular alterations of non-degenerative origin without concomitant pathologies | Acupuncture, ozone, Platelet-Rich Plasma, phonophoresis | Pharmacological treatment, arthrocentesis, occlusal guards or placebo | 8 | 1 | 8 | Yes | Yes | 4 | Critically low |
| Azarcon, 2021 | Clinical Ophthalmology | Oftalmology | Philippines | Patients with diabetic retinopathy whose condition warranted PRP | Novel Panretinal Photocoagulation | Conventional Photocoagulation | 5 | 1 | 17 (13) | No | No | 2 | Low |
| Aziz, 2020 | Complementary Therapies in Medicine | Alternative med/acupuncture | Malaysia | Humans | Effects of pomegranate on lipid profiles | Placebo | 4 | 4 | 17 | Yes | Yes | 2 | Critically low |
| Bach, 2020 | International Urogynecology Journal | Gastroenterology | UK | Postmenopausal women | Use of oestrogen therapy via any route | No oestrogen use, placebo or other therapy | 1 | 1 | 8 (1) | No | No | 2 | Critically low |
| Bakdach, 2021 | International Orthodontics | Oral/dental | Syria | Healthy growing male and female patients with any ethnic group | Functional orthodontic treatment using Forsus Fatigue Resistant Device enhanced by miniplates or miniscrews | Functional orthodontic treatment using the conventional Forsus Fatigue Resistant Device | 5 | NOT STATED | 7 (4) | No | No | 3 | Moderate |
| Baldwin, 2020 | BMJ open | Orthopedic | UK | Rotator cuff repair | Patches to augment rotator cuff surgery | Anything | 5 | 4 | 7 | No | No | 2 | Low |
| Balian, 2021 | International Journal of Environmental Research and Public Health | Psychology | Italy | Children with autism spectrum disorders | Effect of visual pedagogy | No treatment or outcomes measured before and after visual pedagogy administration | 2 | 1 | 23 (5) | No | No | 1 | Moderate |
| Baunwall, 2020 | EClinicalMedicine | Infectious | Denmark | Recurrent Clostridioides difficile infection | Faecal microbiota transplantation | Anything | 1 | 1 | 9 | No | Yes | 1 | Critically low |
| Bausch, 2021 | The Journal Of Urology | Infectious | Switzerland | Adult patients undergoing transurethral  resection of bladder tumors | Any regime or duration of antimicrobial prophylaxis applied 24 hours prior to or during the operation for prophylactic reasons only | Placebo or no treatment | 2 | 1 | 7 (5) | No | No | 1 | Critically low |
| Bhagavan, 2020 | CNS Drugs | Psychiatry | New Zealand | Insomnia | Cannabinoids | Standard care | 5 | NOT STATED | 2 | No | No | 1 | Low |
| Borges, 2020 | The Journal Of Prosthetic Dentistry | Oral/dental | Brazil | Mandibular edentulous patients with Osseo integrated dental implants | Rehabilitation with implant-supported mandibular overdentures | Fixed dental prostheses | 5 | 2 | 10 (5) | No | Yes | 2 | Moderate |
| Bortolotti, 2019 | European Journal of Orthodontics | Oral/dental | Italy | Adult and/or young adult patients | Surgically assisted rapid maxillary expansion | No fixed retention | 2 | NOT STATED | 9 | Yes | Yes | 2 | Low |
| Cabral, 2020 | Clinical Nutrition | Metabolic | Brazil | Overweight and obese individuals | Live probiotics | Randomized controlled trials | 23 | 16 | 24 | Yes | No | 1 | High |
| Cardoso, 2020 | Progress in Orthodontics | Oral/dental | Brazil | Adult patients during orthodontic treatment | Patients treated with clear aligners | Patients treated with conventional fixed appliances | 1 | 1 | 5 (1) | No | Yes | 1 | Critically low |
| Cavero-Redondo, 2020 | Plos Medicine | Cardiovascular | Spain | Arterial stiffness | Physical exercise | Statins | 1 | 1 | 18 | No | Yes | 1 | Low |
| Chambergo-Michilot, 2021 | Psychiatry Research | Psychiatry | Perù | Adults with depression | Adding omega-3 supplementation to the continuous sertraline therapy | Sertraline plus placebo or just sertraline | 6 | 2 | 4 | Yes | Yes | 3 | Low |
| Chan, 2020 | BMJ Support Palliative Care | Psychology | Australia | Patients with breast cancer (and their family members) or the healthcare system | Interventions delivered by these nurses | Usual care or other control | 6 | NOT STATED | 31 | Yes | No | 2 | Critically low |
| Chang, 2020 | Journal of Diabetes Research | Metabolic | Taiwan | Type 1 Diabetes | Bacillus Calmette–  Guerin vaccination | Standard care | 4 | 1 | 4 | Yes | No | 2 | Critically low |
| Chastin, 2021 | Sports Medicine | Rehabilitation/physical therapy | UK/Belgium | Immune System, Vaccination and Risk of Community-Acquired Infectious Disease | Regular Physical Activity | Less physical activity | 8 | NOT STATED | 48 | No | No | 1 | Critically low |
| Chaudhuri, 2020 | Chest | Emergency/anestesiology | Canada | Intubation risk in the post-operative period | High flow nasal cannula | Conventional oxygen therapy or non-invasive ventilation | 7 | NOT STATED | 11 | Yes | Yes | 1 | Low |
| Chaudhuri, 2021 | Intensive Care Med | Infectious | Canada | Acute respiratory distress  syndrome | Corticosteroids | Placebo or usual care | 8 | 1 | 18 | Yes | Yes | 1 | Low |
| Chen, 2019 | Evidence-Based Complementary and Alternative Medicine | Alternative med/acupuncture | China | Patients with cesarean section | Yimucao injection combined with western medicine | Oxytocin or carboprost tromethamine or misoprostol | 4 | 4 | 48 | Yes | No | 1 | Critically low |
| Chua, 2021 | Int J Paediatr Dent. | Oral/dental | New Zealand | Children and adolescents up to 24 years old | Any different methods of oral health education | Any different methods of oral health education | 6 | 6 | 9 | Yes | Yes | 2 | Low |
| Cieri-Hutcherson, 2019 | Pharmacotherapy | Cardiovascular | New York | Patients with Sickle Cell Disease | Exogenous L-glutamine administration | Placebo | NOT CLEAR | NOT STATED | 3 (2) | No | No | 2 | Critically low |
| Coates, 2020 | Plos One | Gynecology/surgery | Australia | Indications for induction of labour | Different modes or timing of birth | Different modes or timing of birth | 4 | NOT STATED | 68 | No | No | 2 | Critically low |
| Correa, 2021 | Medicina Oral Patologia Oral Y Cirugia Bucal | Oral/dental | Portugal | Drooling irrespective of patients’ underlying disease | Intraglandular botulinum neurotoxin injections into salivary glands | Placebo | 3 | NOT STATED | 5 (2) | No | No | 3 | Critically low |
| Cortegiani, 2020 | Journal of Critical Care | Infectious | Italy | Adult patients with or at risk of COVID-19 | Who had been administered CQ or related formulations, alone or in combination with other drugs | Standard care or other regimens or drugs | 4 | NOT STATED | 32 (6) | No | No | 2 | Low |
| Dagan, 2020 | Heart, Lung and Circulation | Cardiovascular | Australia | Patients with severe aortic stenosis | Transcatheter aortic valve  implantation via any access route with any valve type | Surgical valve replacement with any valve size and type | 4 | 1 | 19 (8) | No | No | 3 | Critically low |
| Damiani, 2021 | Italian Journal of Dermatology and Venereology | Dermatology | Italy | Patients with plaque psoriasis | Narrow band Ultraviolet B or Psoralen Ultraviolet A as monotherapy | Narrow band Ultraviolet B or Psoralen Ultraviolet A as monotherapy with different regimens of frequency | 1 | 1 | 8 (8) | Yes | No | 1 | Critically low |
| De Albuquerque Coelho, 2020 | Neurourology and Urodynamics | Gynecology/surgery | Brazil | Women with symptomatic POP | Pessaries | Pelvic floor muscle training | 2 | 1 | 21 (2) | No | No | 3 | Critically low |
| De Figueiredo Caldas, 2021 | Advances in Rheumatology | Neurology | Brazil | Patients with systemic sclerosis, diagnosed using the ACR/EULAR (American College of Rheumatology/ European League Against Rheumatism )and/or Leroy classification | Rituximab | Placebo or other treatment | 2 | NOT STATED | 10 (3) | No | No | 4 | Critically low |
| De Oliveria, 2021 | Photodiagnosis and Photodynamic Therapy | Oral/dental | Brazil | Patients with oral mucositis lesions | Photodynamic therapy or photodynamic therapy associated with other treatment | Non-photodynamic therapy applied | NOT CLEAR | NOT STATED | 5 (5) | Yes | No | 3 | Critically low |
| De Vega, 2021 | Global Spine Journal | Orthopedic | UK | Children and adolescents with any spinal diseases needing spinal fusion with pedicle screw | Conventional freehand, modified freehand, fluoroscopy, computed tomography-based navigation, robot, ultrasound | Other method(s) described in the intervention | 3 | NOT STATED | 6 (4) | No | Yes | 3 | Critically low |
| Deakin, 2020 | Resuscitation | Emergency/anestesiology | UK | Adult patients with a shockable cardiac arrest rhythm | Double sequential defibrillation (DSD) | Standard defibrillation strategies | 5 | 3 | 9 (1) | No | Yes | 1 | Low |
| Decurcio, 2019 | Journal of Endodontics | Oral/dental | Australia | Adult patients undergoing root canal treatment | Machine-assisted agitation | Syringe irrigation with needle | 1 | 1 | 6 | Yes | Yes | 1 | Critically low |
| Dedousis-Wallace, 2020 | Clinical Child and Family Psychology Review | Psychology | Australia | Children and adolescents (3–16 years) with disruptive behavior problems | Parent management training | No training | NOT CLEAR | NOT STATED | 21 | Yes | No | 1 | Critically low |
| Del Lhano, 2019 | Dentomaxillofac Radiol | Oral/dental | Brazil | Patients involved in third molar extractions | CBCT (Cone-beam computed tomography) | Panoramic radiography | 1 | 1 | 4 | Yes | Yes | 3 | Critically low |
| Dembrovsky, 2021 | Infectious Diseases and Therapy | Infectious | Hungary | Clostridium difficile | Fecal Microbiota Transplantation | Any intervention | 2 | 1 | 6 | Yes | Yes | 1 | Low |
| DeMott, 2020 | Epilepsy & Behavior | Neurology | USA | Patients with status epilepticus | Levetiracetam | Phenytoin | 3 | 1 | 9 | Yes | No | 2 | Low |
| Deschodt, 2020 | International Journal of Nursing Studies | Psychology | Belgium/Switzerland | Home-dwelling older population | Nurse-led integrated care | Usual care | 6 | 6 | 11 | No | No | 1 | Low |
| Di Francesco, 2021 | BMC Oral Health | Oral/Dental | Italy | Fully edentulous patients | Four splinted maxillary implant-supported overdentures | Six splinted implants | 4 | NOT STATED | 15 (6) | No | No | 2 | Critically low |
| Do rosario, 2020 | Current Nutrition Reports | Cardiovascular | Australia | Young adults (18–59 years of age) | Dietary intervention with anthocyanins in whole food or purified extract | Group receiving a control intervention | 7 | NOT STATED | 13 (0) | No | No | 1 | Critically low |
| Dos Santos, 2020 | Progress in Orthodontics | Oral/Dental | Brazil | Orthodontic patients with permanent dentition who underwent premolar extraction, and canine retraction or total anterior retraction | Micro-osteoperforations (MOPs) during canine retraction or total anterior retraction | Canine retraction or total anterior retraction without MOPs or other interventions | 7 | 1 | 12 (12) | Yes | Yes | 2 | Moderate |
| Dykukha, 2021 | Pain Medicine | Neurology | Germany | Patients with chronic non-cancer neuropathic pain | Nabiximols | Placebo | 1 | 1 | 9 (9) | Yes | Yes | 2 | Critically low |
| Elkady, 2020 | Journal of Dentistry | Oral/Dental | Egypt | Patients undergoing Glass Ionomer Cements restorations for dental caries | Cavity pretreatment with clorexidine (CHX) or the restoration mix-in of CHX on the | Similar restorative approach without CHX | 1 | 1 | 4 (4) | Yes | Yes | 1 | Low |
| El-Sakka, 2021 | Andrology | Urology | Egypt | Peyronie’s Disease | Conservative therapy | Placebo or no treatment | 3 | NOT STATED | 12 | No | No | 1 | Critically low |
| Esagian, 2021 | Cancers | Oncology | Greece | Patients with any age, sex, or race with metastatic renal cell carcinoma | Cytoreductive nephrectomy combined with targeted therapy | Targeted therapy alone | 3 | NOT STATED | 15 (1) | No | No | 1 | Critically low |
| Fan, 2021 | Journal of Pharmacy Practice | Gynecology | USA | Women with Polycystic Ovary Syndrome- Related Infertility | Black cohosh (cimicifuga racemosa) | Other treatments | NOT CLEAR | NOT STATED | 5 (5) | Yes | No | 2 | Critically low |
| Farkhondeh, 2021 | Current Oncology | Oncology | Iran | Non-diabetic cancer patients | Metformin | Placebo or no drugs | 1 | 1 | 9 (9) | Yes | No | 2 | Critically low |
| Farmakis, 2021 | Journal of Cardiovascular Pharmacology | Cardiovascular | Greece | Patients with hypercholesterolemia | Proprotein convertase subtilisin/kexin type 9 inhibitors | Placebo and/or ezetimibe and/or other lipid-lowering therapy | 9 | 1 | 41 (41) | Yes | No | 2 | Low |
| Fawzy El-Sayed, 2019 | International Endodontic Journal | Oral/Dental | Egypt, Germany | Animals or humans with pulpar defects | Transplantation of stem/progenitor cells | No transplantation | 3 | 1 | 9 (2) | No | Yes | 1 | Low |
| Fernandez Rodrigues, 2019 | Journal of Clinical Medicine | Rehabilitation/physical therapy | Spain | Adults in any condition | Pilates | Conventional treatment, other exercise | 1 | 1 | 10 (5) | No | No | 1 | Low |
| Fitzpatrick, 2020 | BMJ Open | Psychology | UK | Individuals with either type 2 diabetes and/or cardiovascular disease. | Interventions aimed at improving medication adherence | No interventions | 1 | 1 | 28 (28) | Yes | No | 1 | Critically low |
| Fu, 2020 | Medicine® | Alternative med/acupuncture | China | Patients undergoing abdominal surgery with general anaesthesia | Acupuncture therapy | Usual care, sham, medication, or counselling | 4 | 4 | 20 (20) | Yes | No | 3 | Critically low |
| Ghosh, 2020 | Alcohol and Alcoholism | Psychiatry | India | Adults (18–65) both sexes, with alcohol use disorders/alcohol dependence with moderate to severe alcohol withdrawal syndrome | Non-benzodiazepine and non-barbiturate alternatives to treating alcohol withdrawal | Placebo, active controls, alternative medications were used as adjuncts to benzodiazepines | 6 | 6 | 34 (34) | Yes | Yes | 3 | Critically low |
| Ghosn, 2021 | Cochrane Database of Systematic Reviews | Infectious | France | People with COVID-19 | InterleukynL-6 blocking agents | Standard care alone or with placebo | 8 | 5 | 10 (10) | Yes | Yes | 1 | High |
| Giannella 2021 | International Journal of Antimicrobial Agents | Infectious | Italy | Bloodstream infections caused by Enterobacteriaceae | (i) performance of imaging to assess Bloodstream infection source and/or complications; (ii) follow-up blood cultures; (iii) use of loading dose followed by extended/continuous infusion of β-lactams; (iv) duration of treatment (short- versus long-term); and (v) infectious diseases consultation. | No intervention | 4 | 1 | 5 | No | No | 1 | Critically low |
| Glynis, 2021 | Journal of Endodontics | Oral/Dental | UK | Patients undergoing endodontic treatment in mature teeth with pulp necrosis and apical periodontitis | Regenerative endodontic procedures as defined by the authors of the primary studies | Conventional nonsurgical root canal treatment or any other type of regenerative endodontic procedures | 2 | 2 | 4 (4) | Yes | Yes | 1 | High |
| Goncalves, 2020 | Nutrients | Cardiovascular | Portugal | Adults older than 60 years | Potassium-containing supplements or through dietary modification only with sodium or potassium as target components | No intervention/usual sodium or potassium intake | 6 | NOT STATED | 12 (1) | No | No | 1 | Critically low |
| Goodwin, 2021 | Journal of Psychiatric Research | Psychology | Ireland | Adolescents | Film-based education | Other education | 4 | NOT STATED | 10 (3) | No | No | 1 | Critically low |
| Guay, 2020 | Cochrane Database of Systematic Reviews | Orthopaedic | Canada | Adults with hip fracture | Peripheral nerve blocks used as preoperative analgesia, as postoperative analgesia, or as a supplement to general anaesthesia | No nerve block (or sham block) | 7 | 3 | 49 (49) | Yes | Yes | 1 | High |
| Guzman, 2020 | Pain Medicine | Rehabilitation/physical therapy | Spain | Myofascial Trigger Points– Related Dysfunctions | Physical Exercise Programs | Any control | 4 | NOT STATED | 24 | Yes | No | 2 | Low |
| Hariyanto, 2021 | Clinical and Experimental Pharmacology and Physiology | Infectious | Tangerang | Adults COVID-19 patients | Colchicine | Standard care or other medications | NOT CLEAR | NOT STATED | 8 (3) | No | No | 3 | Critically low |
| Hemmingsen, 2021 | Cochrane Database of Systematic Reviews | Metabolic | Indonesia | People with type 1 diabetes mellitus | (ultra-)long-acting insulin analogues to neutral protamine Hagedorn insulin | another (ultra-)long-acting insulin analogue | 16 | 3 | 26 (26) | Yes | Yes | 1 | High |
| Ho, 2021 | The Lancet Child & Adolescent Health | Psychology | Germany | Children and adolescents with overweight and obesity | School-based intervention | Other/no interventions | 7 | 1 | 12 (12) | Yes | Yes | 1 | High |
| Hollands, 2019 | Cochrane Database of Systematic Reviews | Psychology | Singapore | Adults | Altering the availability (range and/or amount of options) of food, alcohol, and tobacco products, or their proximity to potential consumers | No intervention | 4 | 2 | 24 (24) | Yes | Yes | 1 | High |
| Hoy, 2021 | Complementary Therapies in Medicine | Alternative med/acupuncture | UK | Healthy adults aged ≥60 | Yoga-based interventions | No/other interventions | 1 | 1 | 6 (6) | Yes | No | 2 | Critically low |
| Hu, 2021 | Frontiers in Pharmacology | Alternative med/acupuncture | Sweden | Adults (≥18 years old) with an established diagnosis of Type 2 Diabetes Mellitus | Huang-Lian Jie-Du Decoction or Huang-Lian Jie-Du Decoction and metformin | Metformin or no intervention or placebo | 6 | 1 | 9 (9) | Yes | Yes | 1 | Moderate |
| Hyun, 2021 | Journal of Diabetes Science and Technology | Metabolic | China | Adult patients with type 2 diabetes mellitus | Care management using a mobile application, management using an app with additional e-coaching | Usual glycemic control | 3 | NOT STATED | 14 (14) | Yes | No | 2 | Low |
| Ibarra, 2021 | Lasers in Medical Science | Neurology | Republic of Korea | Patients diagnosed with trigeminal neuralgia | Photobiomodulation | Control or comparator | 3 | 1 | 6 (5) | No | No | 3 | Critically low |
| Ibrahim, 2020 | Restorative Dentistry & Endodontics | Oral/dental | Brazil | Adult patients with non-vital mature permanent teeth | Calcium hydroxide | No or other intracanal medications | 3 | 2 | 16 (16) | Yes | Yes | ND | Moderate |
| Inamdar, 2020 | Developmental Medicine & Child Neurology | Rehabilitation/physical therapy | Egyp | Young children (< 5years old) with or at risk for cerebral palsy | Physical therapy interventions targeting sitting postural control | Physical therapy intervention or no intervention | 1 | 1 | 12 (12) | Yes | No | 1 | Critically low |
| Inhae, 2021 | International Journal of Nursing Studies | Psychology | USA | Healthy young adults who represented emerging adults | mHealth interventions for sexual and reproductive health | Standard care or did not attend a mHealth program | 2 | 2 | 11 (11) | Yes | No | 1 | Critically low |
| Jing, 2021 | Supportive Care in Cancer | Psychology | Republic of Korea | Breast cancer patients | Mindfulness-based interventions | Standard care | NOT CLEAR | NOT STATED | 45 (0) | No | No | 2 | Critically low |
| Kaptan, 2020 | Clinical Psychology & Psychotherapy | Psychology | China | No restriction on the specific population of interest | Eye movement desensitization and reprocessing (different protocols) | No-treatment, wait-list control design, individual Eye movement desensitization and reprocessing or trauma focused treatments | 4 | 1 | 22 (8) | No | No | 2 | Critically low |
| Karatas, 2020 | Complementary Therapies in Medicine | Alternative med/acupuncture | UK | Children ages 0–18 years with a health-related condition | Reflexology | Placebo/ sham intervention, pharmacological treatment, other or no treatment | 5 | NOT STATED | 6 (6) | Yes | No | 2 | Critically low |
| Keinki, 2021 | Patient Education and Counseling | Psychology | Turkey | Adult cancer patients | Question prompt list exclusively | Standard care or standard care plus any written material (no question prompt list) | 6 | 6 | 10 (10) | Yes | No | 2 | Low |
| Kelleher, 2021 | Cochrane Database of Systematic Reviews | Dermatology | Germany | Healthyterm (> 37 weeks) infants (0 to 12 months) | Skin care interventions that could potentially enhance skin barrier function, reduce dryness, or reduce subclinical inflammation | Standard care in the localiy / no treatment | 8 | 2 | 17 (17) | Yes | Yes | 1 | High |
| Kim, 2020 | Plos Medicine | Infectious | UK | Patients hospitalized for Covid-19 | Pharmacologic treatment | Standard care or placebo | 6 | NOT STATED | 110 (40) | No | Yes | 1 | Low |
| Kling, 2020 | Journal of Travel Medicine | Infectious | Republic of Korea | All human subjects, 2 months of age or older | Vaccination with IC51 (IXIARO, JESPECT, JEVAL) | Placebo, no vaccination, other vaccination against Japanese encephalitis vaccine, coadministration with other vaccines, immunogenicity after previous vaccination | 2 | 2 | 32 (15) | No | No | 1 | Critically low |
| Knosel, 2020 | Journal of Orofacial Orthopedics | Oral/dental | Germany | Preadolescents, adolescents, and adults with angle class II malocclusions | Orthodontic fixed or removable bimaxillary functional appliances for Angle class II malocclusion correction used in stepwise mode | Orthodontic fixed or removable bimaxillary functional appliances for Angle class II malocclusion correction used in bite-jumping mode | 10 | 5 | 5 (5) | Yes | Yes | 2 | Moderate |
| Kotecha, 2020 | Panminerva Medica | Infectious | Chile, Germany | Patients with suspected and subsequentially diagnosed Covid-19 | Favipiravir, remdesivir, galidesivir, ivermectin, oseltamivir, ganciclovir, lopinavir/ritonavir, darunavir, chloroquine, hydrochloroquine, arbidol, azithromyicn, amoxicillin, moxifloxacin, cefriaxone, antifungals, androgen receptormblockers, tea, traditional chinese medicine | Standard care/placebo | 13 | 3 | 16 (6) | No | Yes | 1 | Low |
| Kotinda, 2020 | Obesity Surgery | Surgery | UK | Patients with body mass index > 27 kg/m2 | Currently used Intragastric balloons with or without lifestyle interventions for at least 12 weeks | Sham or lifestyle interventions or both | 4 | 4 | 13 (13) | Yes | Yes | 1 | Moderate |
| Lam, 2020 | The Journal of Evidence-Based Dental Practice | Oral/dental | Brazil | Children whose primary molars were either sound, having incipient occlusal  carious lesions or non-cavitated carious lesions | The use of pit and fissure sealants in primay molars | Conventional sealants | 3 | 2 | 7 (7) | Yes | Yes | 1 | Critically low |
| Lantz, 2021 | Clinical Spine Surgery | Rehabilitation/physical therapy | Hong Kong | Adults with cervical spine degenerative disorders | Physical therapy after surgery | Non-surgical group | 5 | 2 | 6 (2) | No | Yes | 4 | Critically low |
| Larsen, 2019 | European Review of Aging and Physical Activity | Rehabilitation/physical therapy | California | Older adults (>= 65 y) | Monitor-based physical activity interventions | Older adults not receiving the intervention | 6 | 1 | 21 (20) | No | No | 2 | Low |
| Lata, 2020 | World Journal of Gastrointestinal Endoscopy | Emergency/anestesiology | Denmark | Patients with cirrhosis | Sedation with propofol during gastrointestinal endoscopy | Sedation with midazolam during gastrointestinal endoscopy | 6 | NOT STATED | 8 (8) | Yes | Yes | 2 | Low |
| Lawlor, 2020 | Obesity reviews | Psychology | Brazil | Adults with overweight or obesity | Third-wave cognitive behaviour therapies | No/minimal intervention, behavioural treatment, or no comparator | 13 | 1 | 21 | No | Yes | 1 | Low |
| Lee, 2021 | Journal of Dental Sciences | Oral/dental | UK | Skeletal class III growing patients | Growing patients receiving maxillary protraction and/or expansion | Growing patients not receiving maxillary protraction and/or expansion | 1 | 1 | 6 (2) | No | Yes | 3 | Critically low |
| Lee 2021 (a) | Plos One | Oral/dental | Taiwan | Growing skeletal Class III malocclusion with midfacial hypoplasia | Orthopaedic treatment of maxillary protraction with or without expansion (facemask vs. control, facemask/rapid maxillary extraction vs. control) | Untreated patients | 1 | 1 | 17 (4) | No | Yes | 2 | Moderatew |
| Lee, 2021 (b) | Critical Reviews in Oncology / Hematology | Oncology | Taiwan | Malignant pleural mesothelioma | Prophylactic irradiation of tracts | No irradiation | 3 | 1 | 5 | Yes | Yes | 1 | Critically low |
| Lemieux, 2021 | Plos One | Oncology | Singapore | Patients with nonsurgical hepatocarcinoma | Use of Yttrium-90 transarterial radioembolization in nonsurgical hepatoarcinoma | Standard care in nonsurgical hepatocarcinoma patients | 6 | 1 | 8 (8) | Yes | Yes | 2 | Moderate |
| Leong, 2021 | Anaesthesia | Emergency/anestesiology | Canada | Adult patients undergoing breast surgery | Erector spinae plane block after breast surgery | Other regional blocks | 9 | 2 | 13 (13) | Yes | Yes | 1 | Critically low |
| Li, 2020 | International Journal of Nursing Studies | Psychology | Singapore | Early detection of breast, cervical, colorectal, and lung cancer | Education, patient reminders, counselling, and patient navigation | Standard care or no comparator | 5 | 1 | 10 (10) | Yes | No | 1 | Low |
| Li, 2021 | Clinical Rehabilitation | Rehabilitation/physical therapy | China | Scoliosis | Core-based exercise | Other non-surgical interventions | 4 | 3 | 7 | No | Yes | 1 | Critically low |
| Lie, 2021 | Oral and Maxillofacial surgery | Oral/dental | China | Patient with maxillary atrhopy needing sinus floor augmentation | Patient with tenting maxillary sinus membrane without the use of any bone-substitutes | Sinus floor augmentation using bone grafts | 5 | NOT STATED | 7(7) | Yes | No | 2 | Critically low |
| Lin, 2019 (a) | Western Journal of Nursing Research | Rehabilitation/physical therapy | Germany | Elderly following hip fracture surgery | Comprehensive geriatric care | Routine care | 4 | NOT STATED | 11 (11) | Yes | No | 2 | Critically low |
| Lin, 2019 (b) | Journal of Clinical Medicine | Psychology | Taiwan | Anxiety in pregnancy | Music | Usual care | 1 | 1 | 11 | Yes | No | 1 | Critically low |
| Llaha, 2020 | Frontiers in Nutrition | Metabolic | Taiwan | Overweight or obese adults | Polyphenol supplementation with calorie restricted diet and physical activity | Calorie restricted diet and physical activity | 4 | NOT STATED | 15 (15) | Yes | No | 1 | Critically low |
| Lopes, 2020 | BMJ | Psychology | Spain | Children and adolescents admitted to hospital with acute and chronic conditions | Clown-therapy | Standard care | 1 | 1 | 24 (13) | No | No | 1 | Critically low |
| Lorenzo-Garcia, 2021 | Archives of Physical Medicine and Rehabilitation | Rehabilitation/physical therapy | Brazil | Parkinson Disease | Body Weight Support Gait Training | Physical therapy | 7 | NOT STATED | 12 | Yes | No | 2 | Critically low |
| Magalhaes, 2021 | In vivo | Veterinary | Spain | Companion animal diseases with neoplastic and non-neoplastic diseases | EPA and DHA supplementation | Standard care | NOT CLEAR | NOT STATED | 23 (23) | Yes | No | 4 | Critically low |
| Mah, 2021 | BMC Complementary Medicine and Therapies | Alternative med/acupuncture | Portugal | Older adults with insomnia | Magnesium supplementation | No treatment | 3 | 3 | 3 (3) | Yes | Yes | 1 | Critically low |
| Martinez, 2021 | Human Reproduction Update | Gynecology | Canada | Oocyte donors | Different oocyte stimulation | No comparator | 4 | NOT STATED | 57 (5) | No | No | 1 | Critically low |
| Masarwa, 2021 | Pediatrics | Metabolic | Spain | Children and adolescents with obesity | Treatment with metformin | Placebo, lifestyle interventions | NOT CLEAR | NOT STATED | 24 (24) | Yes | No | 1 | Critically low |
| Mathew, 2020 | Journal of Cancer Survivorship | Psychology | Canada | Adult cancer survivors | Acceptance and commitment therapy | Education, usual care, relaxation training program, behavioral activation | NOT CLEAR | NOT STATED | 13 (5) | No | No | 1 | Critically low |
| Mazuquin, 2021 | Plos One | Rehabilitation/physical therapy | USA | Patients undergoing rotator cuff repair surgery | Early rehabilitation | Delayed/standard rehabilitation | 5 | NOT STATED | 20 (20) | Yes | Yes | 2 | Moderate |
| McNerney, 2020 | Plos One | Psychiatry | UK | Adults patients using opioids | Health coaching | No treatment, minimal/no intervention, virtual treatment, standard care | 4 | 1 | 11 (11) | Yes | Yes | 2 | Moderate |
| Mecenas, 2020 | Angle Orthodontist | Oral/dental | USA | Orthodontic patients with fixed appliances needing Temporary Anchorage Devices | Stainless steel miniplates and mini implants | Titanium miniplates and mini implants | 1 | 1 | 6 (1) | No | Yes | 3 | Moderate |
| Melini, 2021 | Frontiers in Pharmacology | Oral/dental | Brazil | Adult patients (aged 16 or more) undergoing single or multiple dental implant surgeries | Any analgesic drugs, defined as compounds capable of relieving pain without the loss of consciousness. | Any analgesic drugs or placebo. | 5 | NOT STATED | 5 (5) | Yes | No | 1 | Critically low |
| Meza-Mauricio, 2021 | Clinical Oral Investigations | Oral/dental | Italy | Patients submitted to harvesting palatal free gingival graft | Application of platelet-rich fibrin | Alternative method | 3 | 1 | 9 (9) | Yes | No | 1 | High |
| Mheissen, 2020 | Plos One | Oral/dental | Brazil | Orthodontic patients with any type of malocclusion | Piezocision treatment | Conventional orthodontics without any adjunct procedures for accelerating tooth movement | 6 | 2 | 14 (12) | No | Yes | 2 | Moderate |
| Migliavacca, 2020 | Open Heart | Cardiovascular | Arabia | Heart failure | High dose angiotensin converting enzyme inhibitors | Low dose angiotensin converting enzyme inhibitors | 7 | 7 | 8 | Yes | Yes | 1 | Low |
| Mou, 2020 | International Journal of Nursing Studies | Psychology | Brazil | Stroke survivors and family caregivers | Psychoeducational interventions | Standard care | 11 | 4 | 11 (11) | Yes | No | 1 | Moderate |
| Munir, 2020 | Journal of Clinical Medicine | Oral/dental | Japan | Vital pulp therapy of permanent teeth with a carious pulp exposure | Pulp wound lavage in vital pulp therapy | Standard care | 1 | 1 | 27 (26) | No | No | 1 | Critically low |
| Nagendrababu, 2019 (a) | International Endodontic Journal | Oral/dental | Switzerland | Mandibular teeth with irreversible pulpitis | Inferior alveolar nerve block (mepivacaine, prilocaine, articaine, bupivacaine, lidocaine) | Mepivacaine, prilocaine, articaine, bupivacaine, lidocaine | 1 | 1 | 11 | Yes | Yes | 1 | Low |
| Nagendrababu, 2019 (b) | Journal of Endodontics | Oral/dental | Malaysia | Adult patients with pain after nonsurgical root canal therapy | Oral premedications in reducing pain | Placebo, or other agents | 2 | 1 | 7 (7) | Yes | Yes | 1 | High |
| Nagendrababu, 2019 (c) | Journal of Endodontics | Oral/dental | Malaysia | Adult patients undergoing nonsurgical root canal treatment in mandibular teeth with irreversible pulpitis | Gow-Gates, Vazirani-Akinosi, and mental incisive nerve blocks | Inferior alveolar nerve blocks | 2 | 1 | 5 (5) | Yes | Yes | 1 | Critically low |
| Nath, 2020 | Dental Research Journal | Oral/dental | Malaysia | Smokers with periodontitis | Local doxycycline as an adjunct to scaling and root planing | Scaling and root planing alone | 4 | 1 | 5 (5) | Yes | Yes | 3 | Critically low |
| Nauwelaers, 2020 | Foot and Ankle Surgery | Orthopedic | Australia | Chronic midsubstance Achilles tendinopathy individuals | Platelet-rich plasma injections | Placebo, training program | 2 | 1 | 4 (4) | Yes | No | 1 | Critically low |
| Ndunda , 2019 (a) | Cardiovascular Revascularization Medicine | Cardiovascular | Belgium | Coronary stenosis | Dual-Therapy CD34 antibody-covered sirolimus-eluting stent | Conventional stent | 9 | NOT STATED | 3 | No | No | 3 | Critically low |
| Ndunda, 2019 (b) | Cardiovascular Revascularization Medicine | Cardiovascular | US | Transcatheter aortic valve replacement | Sentinel Cerebral Protection System | Absence of device | 5 | NOT STATED | 3 | No | No | 3 | Critically low |
| Nicolodi, 2021 | Disability and Rehabilitation | Rehabilitation/physical therapy | US | Patients with predialysis chronic kidney disease | Aerobic exercise | Standard care | 4 | 1 | 10 (10) | Yes | Yes | 1 | Low |
| Nourredine, 2021 | CNS Drugs | Psychiatry | Brazil | Individuals with addictive and eating disorders | Topiramate treatment | Alternative treatment | 11 | NOT STATED | 62 (42) | No | No | 1 | Critically low |
| Ocskay, 2021 | Annals of Intensive Care | Gastroenterology | France | Acute or chronic liver failure | Liver support system | Standard medical therapy | 9 | 2 | 16 | No | Yes | 1 | Low |
| Oliveira, 2021 | International Journal of Oral Hygiene | Oral/dental | Hungary | Children, adolescents and/or adults with or without orthodontic appliances and with any periodontal diagnosis at baseline | Plaque disclosing methods combined with verbal oral hygiene instructions and brushing demonstration | Standard brushing demonstration | 2 | 2 | 7 (7) | Yes | Yes | 2 | Low |
| Ong, 2020 | American Society for Nutrition | Gynecology | Brazil | Postmenopausal women or ≥55 y old | Fermented milk products consumption | No or low fermented milk products consumption, placebo | 3 | 1 | 9 (3) | No | Yes | 1 | Low |
| Oteri, 2020 | Neurosurgical Review | Psychiatry | Canada | Patients undergoing brain surgery | Clinically relevant preoperative anxiety | No clinically relevant preoperative anxiety | 1 | 1 | 27 (7) | No | Yes | 2 | Critically low |
| Ouyang, 2020 | European Journal of Paediatric Neurology | Rehabilitation/physical therapy | Italy | Children with cerebral palsy | Hand-Arm Bimanual Intensive Training | Standard care or alternative treatment | 1 | 1 | 15 (11) | No | No | 3 | Critically low |
| Owen, 2021 | Critical Care | Cardiovascular | China | Individuals of any age cared for in acute care environment | Vasopressor peripheral intravenous administration | Alternative administration site or absent | 1 | 1 | 23 (4) | No | No | 1 | Critically low |
| Packer, 2021 | Injury | Orthopedic | Canada | Adults with tibial fractures | Suprapatellar intramedullary nail fixation approach | Infrapatellar intramedullary nail fixation approach | 4 | 1 | 16 (5) | No | No | 3 | Critically low |
| Palsson, 2019 | Scandinavian Association for the Study of Pain | Rehabilitation/physical therapy | UK | Any individual with musculoskeletal pain or function | Posture-correcting shirts | Any other type of shirts, none | 2 | 2 | 6 (0) | No | Yes | 2 | Critically low |
| Paludan-Muller, 2020 | Cochrane Database of Systematic Reviews | Infectious | Denmark | Any population | Hand cleaning with ash | Hand cleaning with soap or other materials | 5 | 5 | 14 (1) | No | Yes | 1 | Low |
| Papadopolou, 2021 | Clinical and Experimental Dental Research | Oral/dental | Austria | Patients undergoing orthodontic treatment with fixed appliances | Organic unprocessed products for treating gingivitis | Standard care | 3 | NOT STATED | 3 (3) | Yes | No | 3 | Critically low |
| Perez Ramirez, 2019 | Rehabilitacion | Orthopedic | Greece | Patients with cerebral palsy < 18 years old | Standing devices for the prevention of hip dislocation | Physical therapy, orthosis and/or soft tissue | 7 | 1 | 6 (1) | No | No | 4 | Critically low |
| Piccoli, 2021 | The Journal of Clinical Endocrinology & Metabolism | Oncology | Chile | Adults with excessive weight and/or diabetes | GLP-1 Receptor Agonists | Standard medical therapy | 1 | 1 | 52 | Yes | Yes | 1 | Low |
| Pitsillides, 2021 | Journal of Bodywork & Movement Therapies | Rehabilitation/physical therapy | Brazil | Patients with knee osteoarthritis | Behavioral therapy delivered by a physiotherapist combined with exercise | Routine care, general information | 1 | 1 | 6 (6) | Yes | No | 3 | Critically low |
| Previtali, 2020 | Cartilage | Orthopedic | Cyprus | Patients with knee osteoarthritis | Placebo (saline) injections | Standard care | 4 | 1 | 50 (50) | Yes | Yes | 1 | Critically low |
| Proenca, 2020 | Nutrition Research | Metabolic | Switzerland | Obese/metabolic syndrome patients | Fecal Microbiota Transplantation | Placebo | NOT CLEAR | NOT STATED | 6 (6) | Yes | Yes | 3 | Moderate |
| Qin, 2021 | Journal of Clinical Anesthesia | Psychiatry | Brazil | Adults after non-cardiac surgery | Perioperative dexmedetomidine administration | Standard care | 7 | 1 | 13 (13) | Yes | Yes | 1 | Low |
| Qiu, 2021 | Plos One | Alternative med/acupuncture | China | Patients with limb cramps after stroke | Fire needle | Acupuncture | 6 | 3 | 17 (17) | Yes | No | 2 | Low |
| Ramli, 2021 | International Journal of Medical Sciences | Psychiatry | China | Adult patients (≥18 years) with sexual dysfunction, on opioid substitution therapy for opioid use disorder | Any pharmacological intervention, including herbal preparation | Placebo or other active pharmacological intervention | 4 | NOT STATED | 7 (5) | No | No | 2 | Critically low |
| Rayanakorn, 2020 | Plos One | Infectious | Malaysia | Acute bacterial meningitis | Corticosteroids | Standard medical therapy | 9 | 3 | 9 | Yes | Yes | 2 | Low |
| Reina-Gutiérrez, 2021 | Archives of Physical Medicine and Rehabilitation | Rehabilitation/physical therapy | Malaysia/Taiwan | Interstitial lung disease | Pulmonary rehabilitation | Usual care | 4 | NOT STATED | 11 | Yes | No | 2 | Low |
| Ribeiro, 2021 | Family Practice | Psychiatry | Spain | Elderly adults | Motivational and promotional educational intervention | No intervention | 1 | 1 | 11 (3) | No | No | 3 | Critically low |
| Roh, 2021 | Plos One | Rehabilitation/physical therapy | Brazil | Adults diagnosed with chronic obstructive pulmonary disease (COPD) | Any type of manual therapy | No treatment | 5 | 2 | 13(13) | Yes | Yes | 2 | Low |
| Rosewall, 2020 | Journal of Medical Imaging and Radiation Sciences | Oncology | Korea | Patient with cancer | Use of cannabis in patient undergoing RT | Placebo/standard treatment | NOT CLEAR | NOT STATED | 8(5) | No | No | 3 | Critically low |
| Rossi-Fedele, 2019 | Brazilian Dental Journal | Oral/dental | Canada | Immature permanent tooth with no-vital pulp | Single visit revascularization endodontic procedures | Standard care | 3 | NOT STATED | 5(1) | No | No | 2 | Critically low |
| Rutili, 2021 | European Journal of Othodontics | Oral/dental | Australia | Growing patients in mixed or permanent dentition, with maxillary transverse discrepancy | Rapid maxillary expansion with a fixed jackscrew expander | Slow maxillary expansion with the same fixed jackscrew expander | 5 | 2 | 3(3) | Yes | No | 2 | High |
| Saito, 2021 | Aging Clinical and Experimental Research Journal | Rehabilitation/physical therapy | Italia | Community-dwelling elderly people (more than 60 years old) living in SE Asian countries and regions | Home-based telerehabilitation | Conventional rehabilitation | NOT CLEAR | NOT STATED | 6(6) | Yes | No | 3 | Critically low |
| Santos, 2020 | Brazilian Oral Research | Infectious | Japan | Droplet and/or aerosol dispersion contamination by infected individuals | Homemade and/or commercial cloth masks | Surgical masks and/or N95 respirator | 1 | 1 | 11(1) | No | Yes | 2 | Critically low |
| Santos, 2021 | Journal of Speech Language and Hearing Research | Speech therapy | Brazil | Patients aged 65 or older with reported risk factors of aspiration pneumonia | Pharmacologic and non-pharmacologic interventions | Placebo and standard care | 13 | 6 | 13(13) | Yes | No | 2 | Critically low |
| Schardong, 2020 | Archives of Physical Medicine and Rehabilitation | Rehabilitation/physical therapy | Portugal | Chronic Kidney Failure | Neuromuscular Electrical Stimulation | Control, placebo, or another intervention | 4 | 2 | 6 | No | Yes | 2 | Low |
| Scheufele, 2020 | British Journal of Surgery open | Infectious | Brazil | Upper gastrointestinal surgery | Selective decontamination of the digestive tract | Usual care | 4 | 4 | 4 | Yes | No | 1 | Critically low |
| Shah, 2021 | Diabetes Therapy | Rehabilitation/physical therapy | Germany | Type 2 Diabetes Mellitus patients | Exercise and general physical activity | No exercise /standard treatment /placebo | 6 | 1 | 26(26) | Yes | No | 2 |  |
| Sharma, 2021 | International orthodontics | Oral/dental | China | Patient with presence of palatally displaced canine (PDC) unilateral or bilateral | Interceptive extraction of deciduous maxillary canines in late mixed dentition period | Evaluation of eruption of PDC | 3 | NOT STATED | 4(3) | No | Yes | 3 | Low |
| Shrestha, 2020 | Clinical Rheumatology Journal | Rheumatology | India | Patients with RA | Iguratimod Monotherapy | Placebo and/or standard care | 10 | 4 | 12(12) | Yes | Yes | 3 | Critically low |
| Singh, 2021 | Dermatologic therapy | Dermatology | China | Patients with Psoriasis | Risankizumab monotherapy | Standard care /treatment | 4 | 1 | 7(7) | Yes | Yes | 3 | Low |
| Siritho, 2020 | Neurology Journal | Neurology | India | Neuromyelitis optica spectrum disorders patients | Therapeutic plasma exchanges | Conventional treatment /standard care | NOT CLEAR | NOT STATED | 7(1) | No | No | 1 | Critically low |
| Song, 2021 | Medical internet Research Journal | Rehabilitation/physical therapy | Thailand | Patients with COPD and asthma | Blended interventions | Standard care | NOT CLEAR | NOT STATED | 22(22) | Yes | Yes | 1 | Critically low |
| Soni, 2020 | Expert review of anti-infective therapy | Infectious | Netherlands | Patients with previous epidode of anti-tubercular therapy (ATT) hepatitis | Reintroduction of ATT | Conventional treatment | 1 | 1 | 4(4) | Yes | No | 1 | Critically low |
| Stroehlein, 2021 | Cochrane Database of Systematic Reviews | Infectious | India | People with COVID- 19 | Vitamin D supplementation | Placebo/standard care | 11 | 7 | 3(3) | Yes | Yes | 1 | High |
| Su, 2021 | NeuroRehabilitation Journal | Rehabilitation/physical therapy | UK | Patients with amyotrophic lateral sclerosis | Pulmonary rehabilitation | Conventional treatment /standard care | 2 | 1 | 10(10) | Yes | No | 3 | Critically low |
| Sugianto, 2021 | Knee | Orthopedic | Taiwan | Patients with knee osteoarthritis | Proximal fibular osteotomy | Standard care / conventional treatment | 4 | 1 | 23(1) | No | No | 1 | Critically low |
| Sun, 2020 | Medical Science Monitor Journal | Gynecology/anestesiol | Indonesia | Puerpera | Intrathecal dexmedetomidine | Spinal anesthesia / conventional local anesthetics | 10 | 5 | 10(10) | Yes | No | 3 | Critically low |
| Sun, 2021 | Evidence-based Complementary and Alternative Medicine | Psychology | China | Older adults (55 and older) with subjective cognitive decline | Combined Physical activity and cognitive training interventions | Memory intervention, mental training, health education | 4 | 1 | 11(11) | Yes | No | 1 | Critically low |
| Susai, 2021 | Brain and Neuroscience Advances | Psychiatry | China | Ultra-high-risk population | Omega - 3 FA | conventional treatment | 1 | 1 | 19(2) | No | No | 3 | Critically low |
| Tan, 2021 | Stroke & Vascular Neurology | Cardiovascular | Ireland | Secondary stroke prevention | Cilostazol | Another antiplatelet regimen or placebo | 7 | 3 | 18 | Yes | Yes | 2 | Critically low |
| Thangaraju, 2021 | BMJ | Emergency/anestesiology | Singapore | Adults with moderate to severe postoperative pain | Sufentanil sublingual tablet system formulation | Conventional treatment /other opioids | 7 | 2 | 6(6) | Yes | Yes | 1 | Critically low |
| Tuohy, 2021 | Biomolecules | Oftalmology/medical chronic | India | Inherited retinal degenerations patients (either non syndromic or syndromic) | Any investigational gene therapy interventions for IRD | No comparators available | 13 | 3 | 6(1) | No | No | 2 | Critically low |
| Tovo, 2021 | European Journal of Gastroenterology and Hepatology | Infectious | UK | Adult chronic infection with hepatitis B “e” antigen -positive patients over 18 | Antiviral therapy | No treatment | 5 | NOT STATED | 4(2) | No | No | 4 | Critically low |
| Tsai, 2020 (a) | Clinical Drug Investigation | Pharmacology | Brazil | Hemoptysis | Tranexamic Acid | Usual care | 6 | 4 | 4 | Yes |  | 3 | Critically low |
| Tsai, 2020 (b) | Archives of Osteoporosis | Orthopedic | Taiwan | Osteoporotic spinal fusion | Teriparatide | Bisphosphonates | 6 | 2 | 5 | No |  | 2 | Critically low |
| Tsapas, 2021 | Diabetes obesity and metabolism | Metabolic | US/Taiwan | Adults with type 2 diabetes | Glucose-lowering medications | Usual care | 3 | 3 | 424 | Yes | No | 1 | Critically low |
| Ujhelyi-Gomez, 2021 | Addiction | Psychology | Greece/Uk | Pregnant women and mothers with dependent children | Psychosocial interventions aimed at reduced alcohol use or abstinence | Usual care or no intervention | 2 | 2 | 24 (24) | Yes | No | 1 | Low |
| Vadalà, 2020 | Clinic Medicine Journal | Rehabilitation/physical therapy | UK | Elderly patients (mean age more than 65 years old) with Chronic Low Back Pain at least more than 3 months | Physical Activity | Standard care | 2 | 2 | 12(7) | No | Yes | 1 | Critically low |
| Van dijk, 2020 | BMC Geriatrics | Rehabilitation/physical therapy | Italy | Older patient admission | Caregiver involvment | Usual care | 7 | 1 | 4 | No | No | 2 | Critically low |
| Van Truong, 2020 | International journal of nursing practice | Metabolic | Belgium | Older adults with hypertension | Self-management interventions, self- care, self-efficacy, cognitive behavioural and education programs | Usual care | 5 | 2 | 12(12) | Yes | No | 2 | Critically low |
| Wali, 2021 | BJOG: an international journal of obstetrics & gynaecology | Gynecology/surgery | Taiwan | Myomectomy | Misoprostol | Usual care | 6 | 3 | 14 | Yes | No | 1 | Critically low |
| Wamkpah, 2020 | JAMA Otolaryngol Head Neck Surg | Rehabilitation/physical therapy | UK | Iatrogenic facial palsy | Physical therapy | No Therapy or other interventions | 2 | 1 | 4 | No | No | 1 | Critically low |
| Wang, 2021 | Complementary therapies in medicine | Psychology | US | Older adults with sleep difficulties | Music therapy as the only intervention including active and passive music | No treatment | 1 | 1 | 9(5) | No | No | 2 | Critically low |
| Weissheimer, 2021 | International Endodontic Journal | Oral/dental | China | Patient with teeth with vital pulps | Orthodontic movements | Teeth which were not orthodontically moved | 1 | 1 | 12(5) | No | Yes | 1 | Moderate |
| Wen, 2020 | BMC Surgery Journal | Emergency/anestesiology | Brazil | Return of G1 function in patient after general anaeshesia | Stellate ganglion block (SGB) | general anaestesia alone (i.e. no block) | 5 | 1 | 5(5) | Yes | Yes | 3 | Low |
| Witt, 2021 (a) | Cochrane Database of Systematic Reviews | Psychiatry | China | Children and adolescents at risk of self-harm | Psychosocial interventions or pharmacological agents or natural products | Standard of care | 8 | 1 | 17 (17) | Yes | Yes | 1 | High |
| Witt, 2021 (b) | Cochrane Database of Systematic Reviews | Psychiatry | Australia | Self-harm in adults (aged 18 years or older) | Cognitive behavioural therapy, mentalisation -based therapy, emotion regulation psychotherapy, standard dialectical behaviuor therapy | Treatment as usual or another comparator | 8 | 1 | 76(76) | Yes | Yes | 1 | High |
| Wong, 2020 | Academic Emergency Medicine | Emergency/anestesiology | Australia | Patients with chronic non-cancer pain | Any intervention to manage chronic non cancer pain | Standard care | 5 | 1 | 13 (4) | No | Yes | 1 | Critically low |
| Woon, 2020 | Journal of reproductive immunology | Gynecology | Canada | Women with RM or RIF with confirmed abnormal level of NK cells level | Immunotherapy | Placebo/no intervention | 5 | NOT STATED | 7(3) | No | No | 3 | Low |
| Xu, 2021 | Clinical Cardiology Journal | Cardiovascular | UK | Patient with coronary heart disease | Home based exercise, mobile health education | Usual care | 10 | 8 | 16(16) | Yes | Yes | 3 | Critically low |
| Zaffagnini, 2021 | The Orthopaedic Journal of Sports Medicine | Orthopedic | China | Patient with meniscal lesions | Meniscal repair combined with biologic PRP (platelet-rich-plasma) augmentation | Isolated meniscal repair | 4 | NOT STATED | 5(1) | No | No | 2 | Critically low |
| Zee, 2020 | The Orthopaedic Journal of Sports Medicine | Orthopedic | Italy | Patient with anterior cruciate ligament (ACL) lesion | ACL reconstruction (to reduce range of tibial rotation) | No intervention | 1 | 1 | 13(4) | No | No | 2 | Critically low |
| Zhang, 2020 (b) | BMC Complementary Medicine and Therapies Journal | Alternative med/acupuncture | Netherlands | Patient suffered from RA (rheumatoid arthritis) | Oral Chinese patent medicines | Conventional medicines | 6 | 2 | 116(116) | Yes | No | 3 | Critically low |
| Zhang, 2021 | Lasers Medical Science Journal | Oral/dental | China | Individuals undergoing mini-implant insertion | All types of photobiomodulation therapy (PBMT) | Mini - implant receiving no PBMT | 3 | 1 | 7(4) | No | No | 1 | Low |
| Zhang, 2020 (a) | International Journal of Nursing Studies | Rehabilitation/physical therapy | China | Patients with stroke | Exercise-based interventions | Standard of care | 1 | 1 | 16 (16) | Yes | No | 1 | Critically low |
| Zheng, 2021 | Scandinavian journal of medicine & science in sports | Rehabilitation/physical therapy | China | Sedentary behavior | Sedentary behavior interventions | Usual care | 2 | 2 | 3 | No | No | 1 | Critically low |
| Zymperdikas, 2020 | Journal of Dental Research | Oral/dental | China | Dental treatment | Bisphosphonates | Placebo or untreated controls | 6 | 2 | 11 | Yes | Yes | 1 | Low |

**Appropriate, inappropriate and can’t tell use of RoB2 tool according to reviews characteristics**

|  |  | **All # (column%)** | | **Appropriate # (row%)** | | **Not appropriate # (row%)** | | **Can't tell # (row%)** | |
| --- | --- | --- | --- | --- | --- | --- | --- | --- | --- |
| **Amstar** | |  | |  |  |  |  |  |  |
|  | Critically low | 112 | 57.14 | 47 | 41.96 | 23 | 20.54 | 42 | 37.50 |
|  | Low | 51 | 26.02 | 25 | 49.02 | 12 | 23.53 | 14 | 27.45 |
|  | Moderate | 19 | 9.69 | 13 | 68.42 | 3 | 15.79 | 3 | 15.79 |
|  | High | 14 | 7.14 | 10 | 71.43 | 4 | 28.57 | 0 | 0.00 |
| **Impact factor** | |  | |  |  |  |  |  |  |
|  | Q1 | 91 | 46.67 | 55 | 60.44 | 17 | 18.68 | 19 | 20.88 |
|  | Q2 | 59 | 30.26 | 20 | 33.90 | 16 | 27.12 | 23 | 38.98 |
|  | Q3 | 38 | 19.49 | 16 | 42.11 | 8 | 21.05 | 14 | 36.84 |
|  | Q4 | 7 | 3.59 | 3 | 42.86 | 1 | 14.29 | 3 | 42.86 |
| **Area** | |  | |  |  |  |  |  |  |
|  | Alternative Medicine, Acupuncture | 10 | 5.10 | 3 | 30.00 | 6 | 60.00 | 1 | 10.00 |
|  | Dental Care | 40 | 20.41 | 19 | 47.50 | 8 | 20.00 | 13 | 32.50 |
|  | Medical Area (chronic disease) | 45 | 22.96 | 22 | 48.89 | 6 | 13.33 | 17 | 37.78 |
|  | Medical Area (infectious) | 20 | 10.20 | 11 | 55.00 | 4 | 20.00 | 5 | 25.00 |
|  | Rehabilitation, Physioterapy, Speech Therapy | 25 | 12.76 | 11 | 44.00 | 6 | 24.00 | 8 | 32.00 |
|  | Surgery | 15 | 7.65 | 8 | 53.33 | 2 | 13.33 | 5 | 33.33 |
|  | Psychiatry/Psychology | 32 | 16.33 | 18 | 56.25 | 6 | 18.75 | 8 | 25.00 |
|  | Anestesiology, Emergency | 9 | 4.59 | 3 | 33.33 | 4 | 44.44 | 2 | 22.22 |
| **Country** | |  |  |  |  |  |  |  |  |
|  | Europe | 81 | 41.33 | 37 | 45.68 | 15 | 18.52 | 29 | 35.80 |
|  | North America | 21 | 10.71 | 11 | 52.38 | 2 | 9.52 | 8 | 38.10 |
|  | South America | 26 | 13.27 | 15 | 57.69 | 6 | 23.08 | 5 | 19.23 |
|  | Africa | 5 | 2.55 | 3 | 60.00 | 1 | 20.00 | 1 | 20.00 |
|  | Oceania | 12 | 6.12 | 6 | 50.00 | 0 | 0.00 | 6 | 50.00 |
|  | Middle East | 1 | 0.51 | 0 | 0.00 | 0 | 0.00 | 1 | 100.00 |
|  | South East asia | 17 | 8.67 | 8 | 47.06 | 5 | 29.41 | 4 | 23.53 |
|  | Far East | 33 | 16.84 | 15 | 45.45 | 13 | 39.39 | 5 | 15.15 |

**Results of the AMSTAR 2 evaluation**


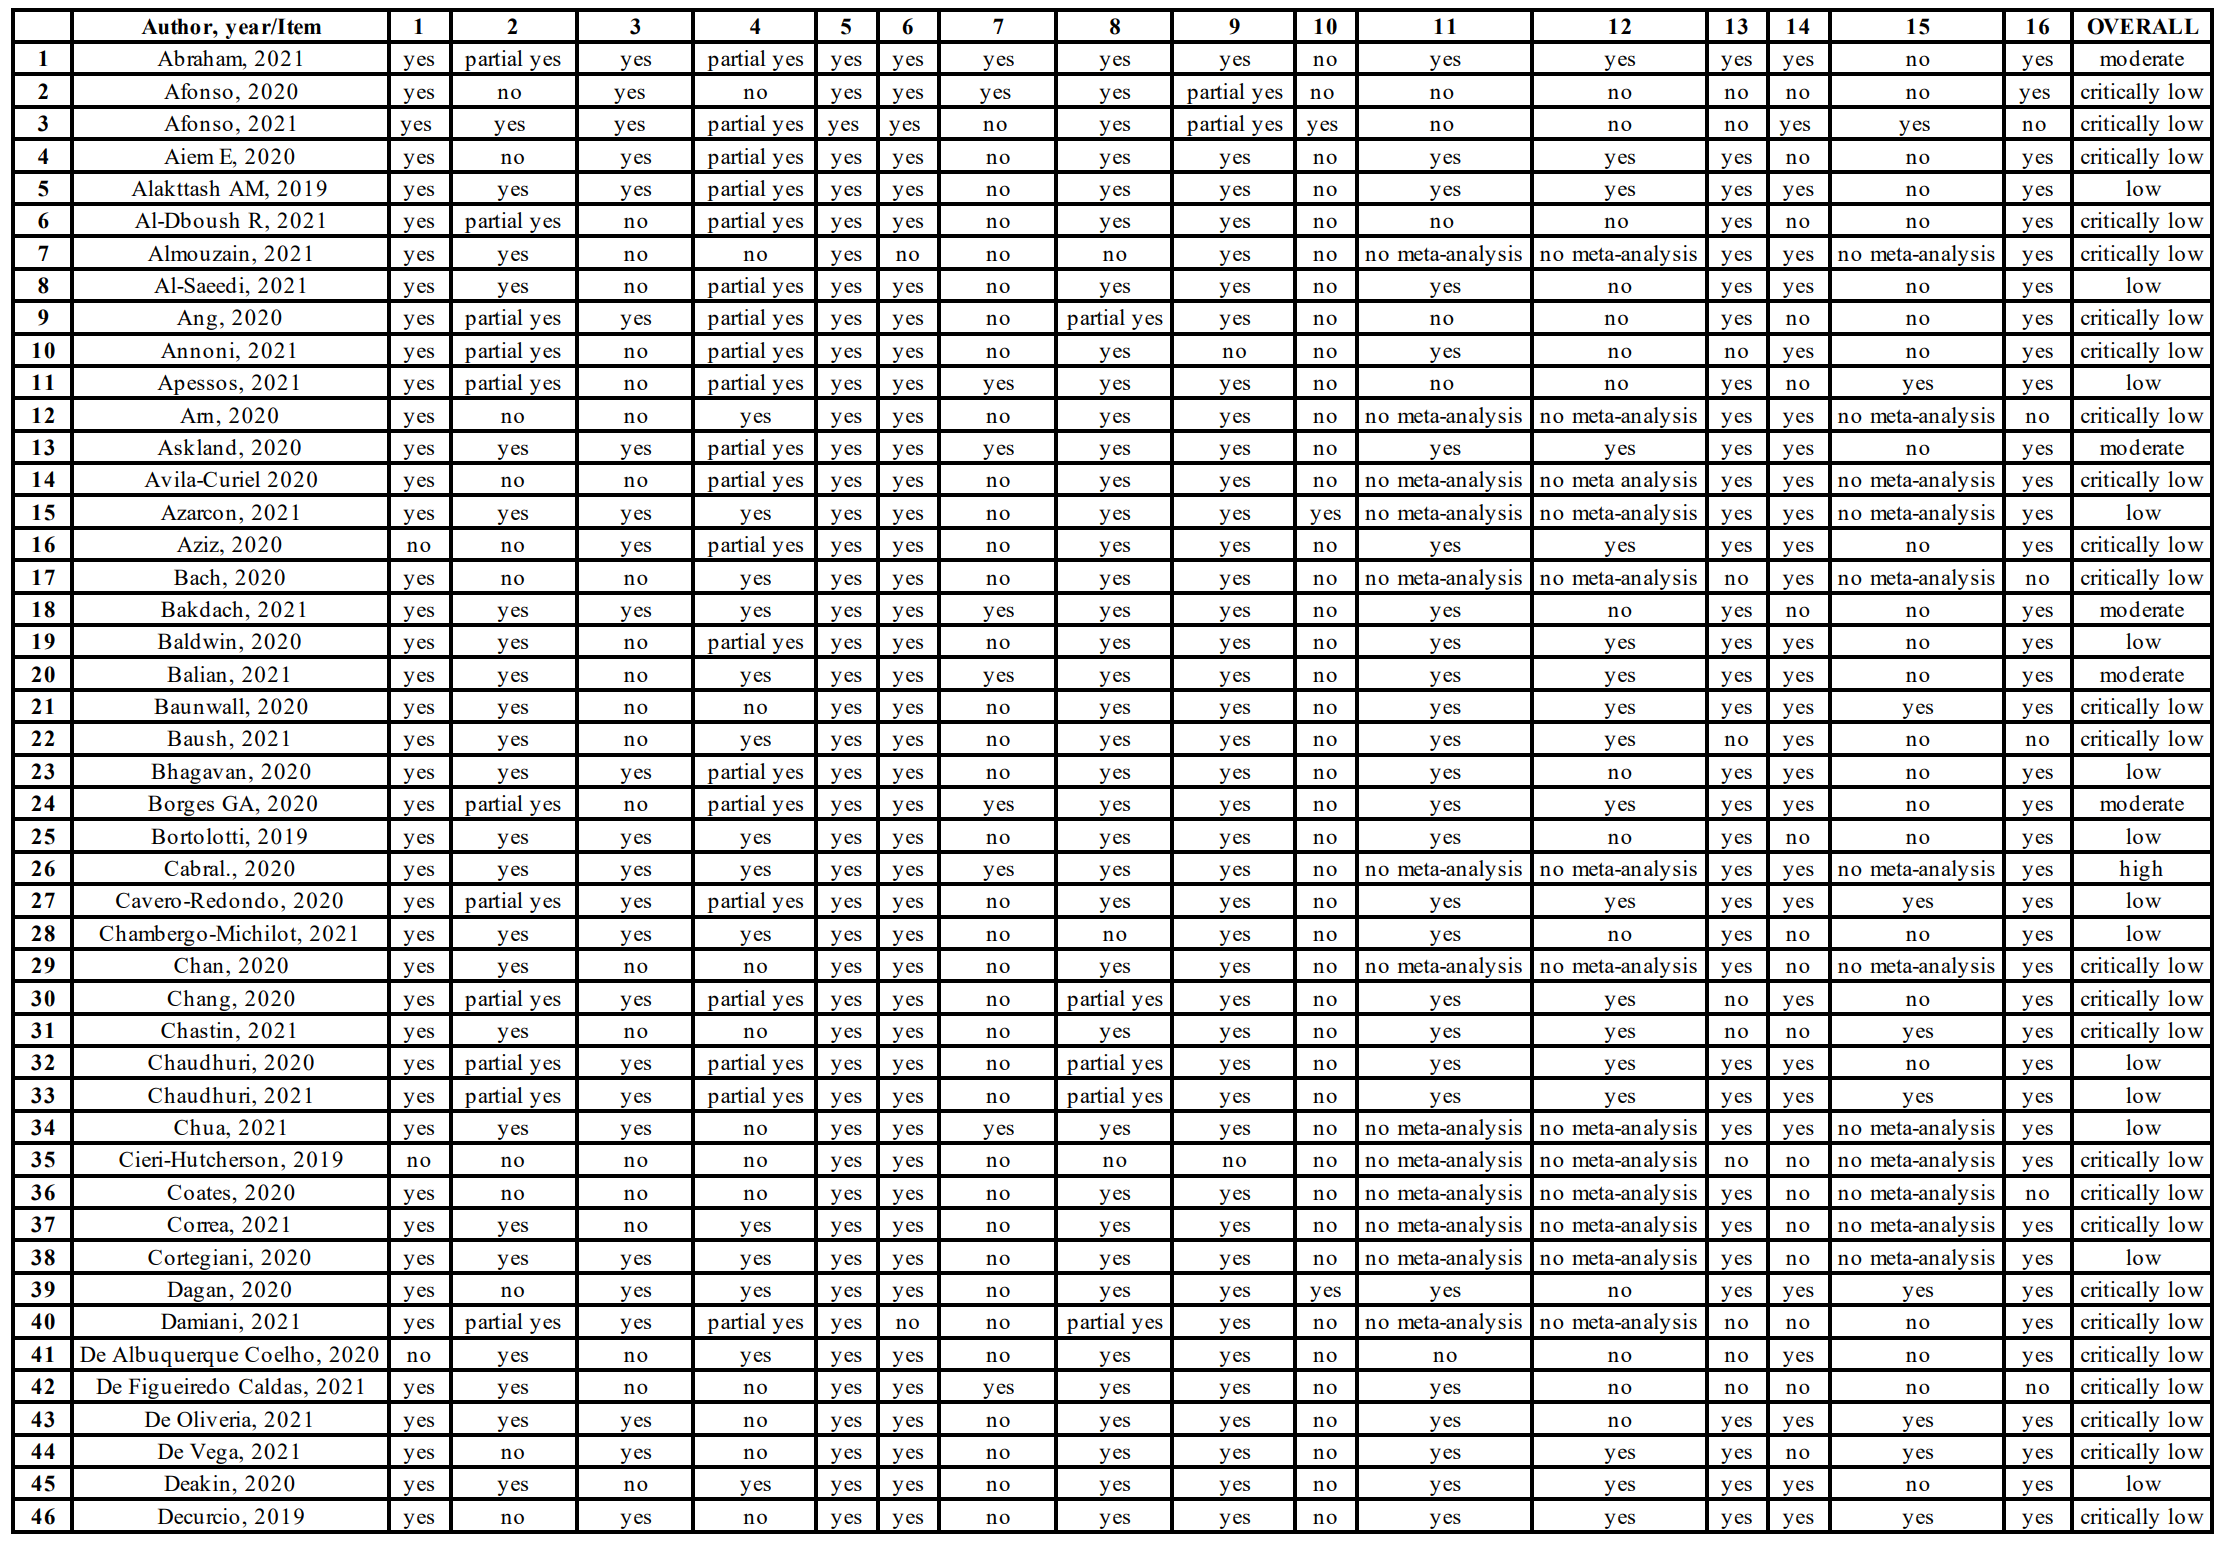


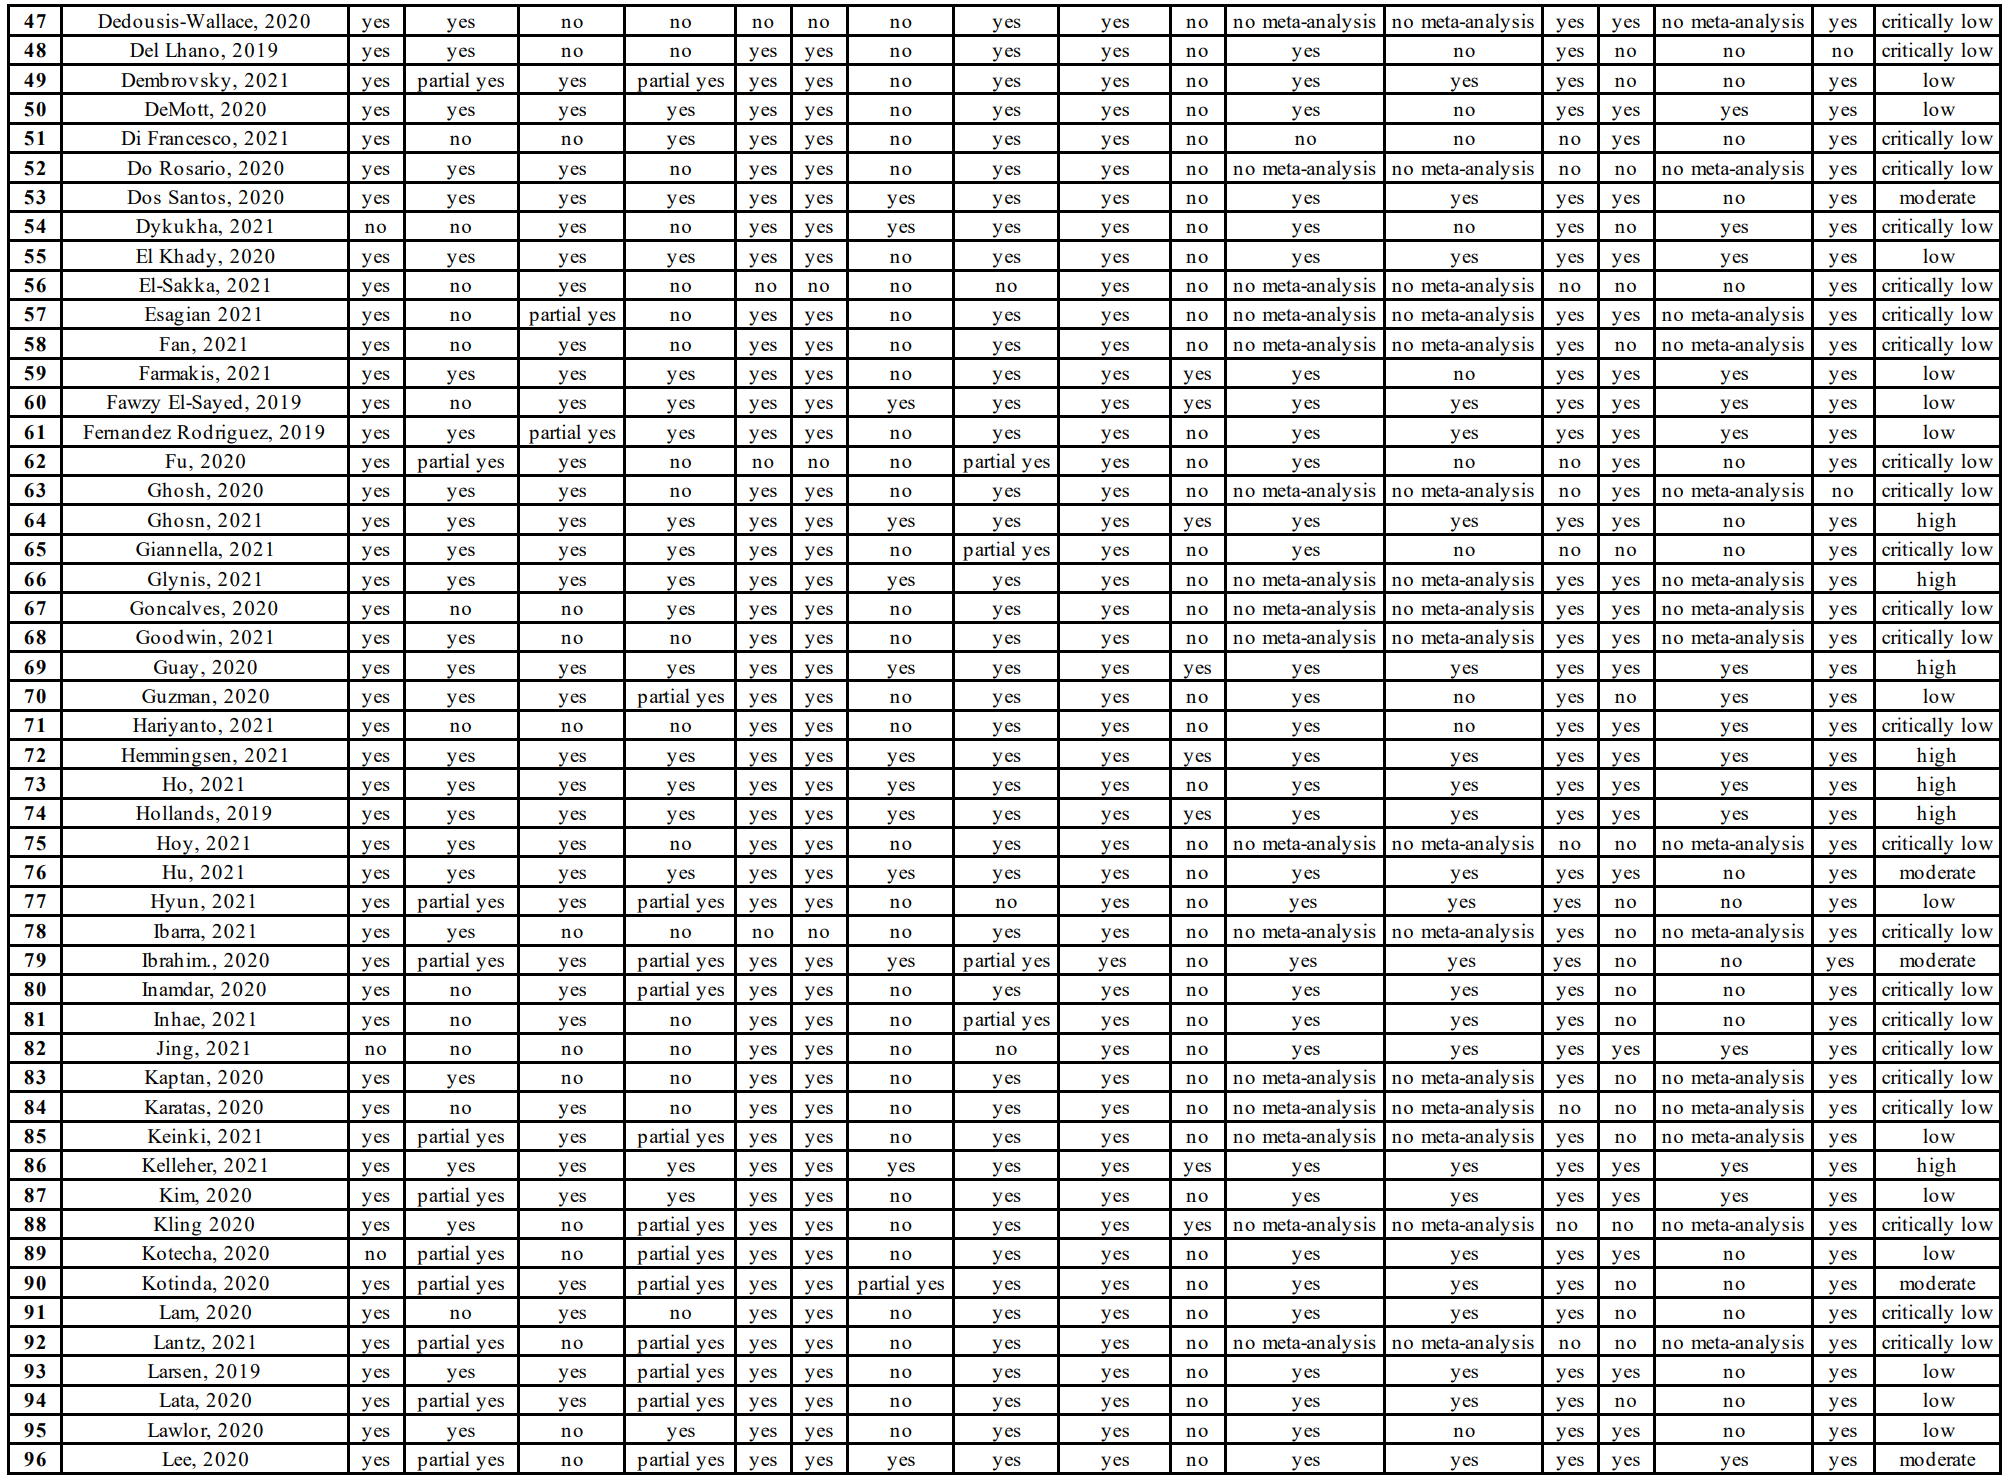


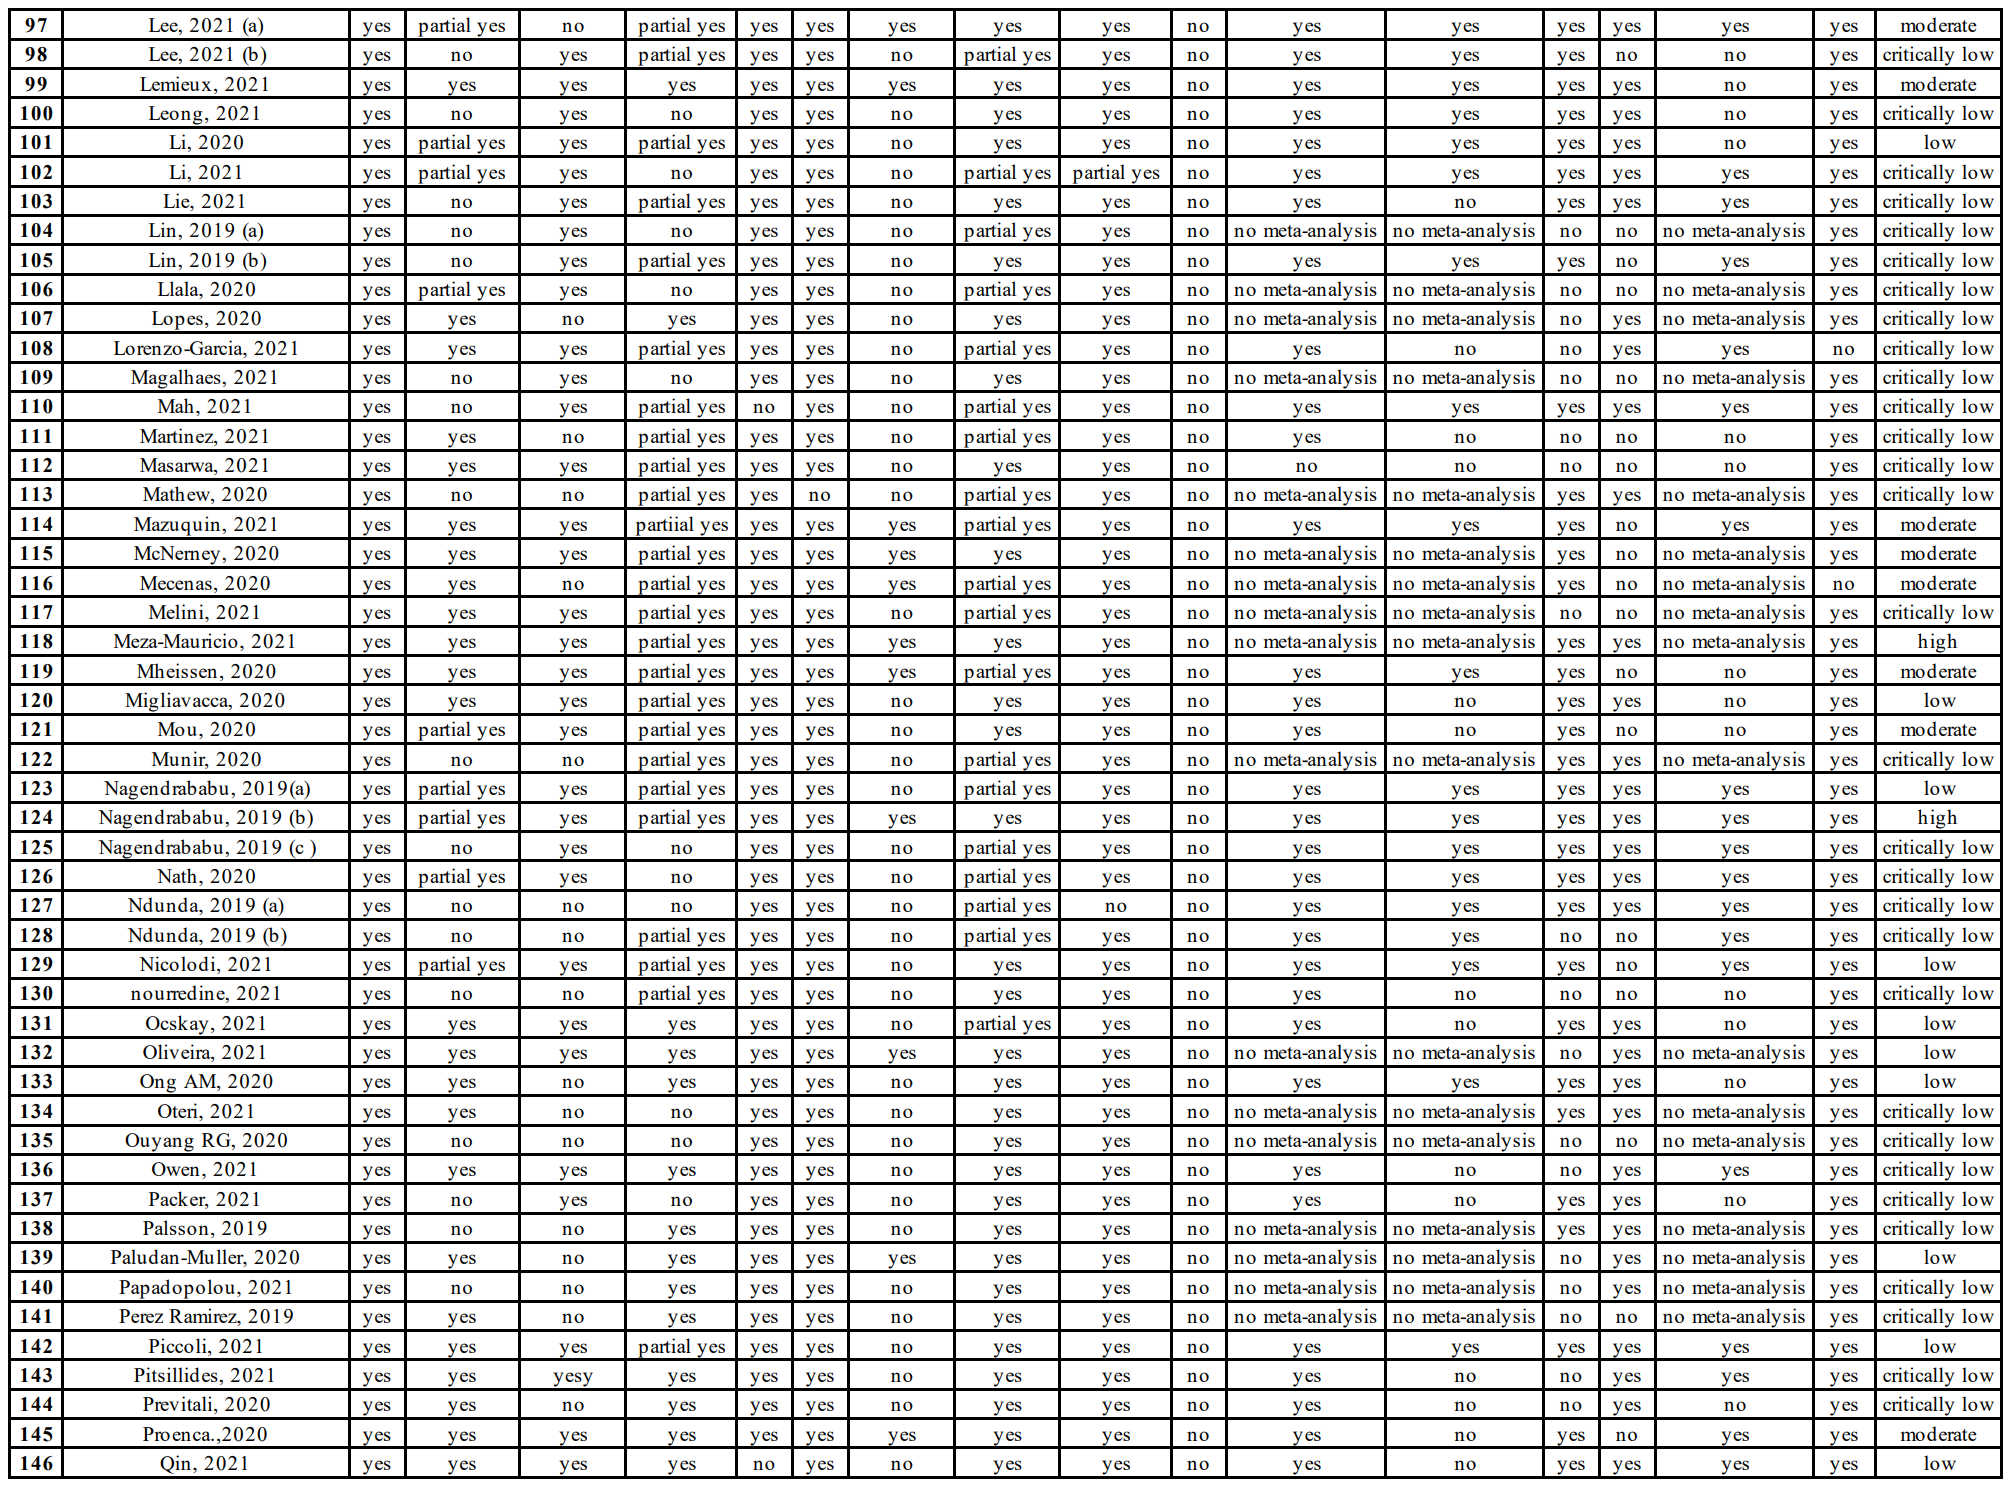


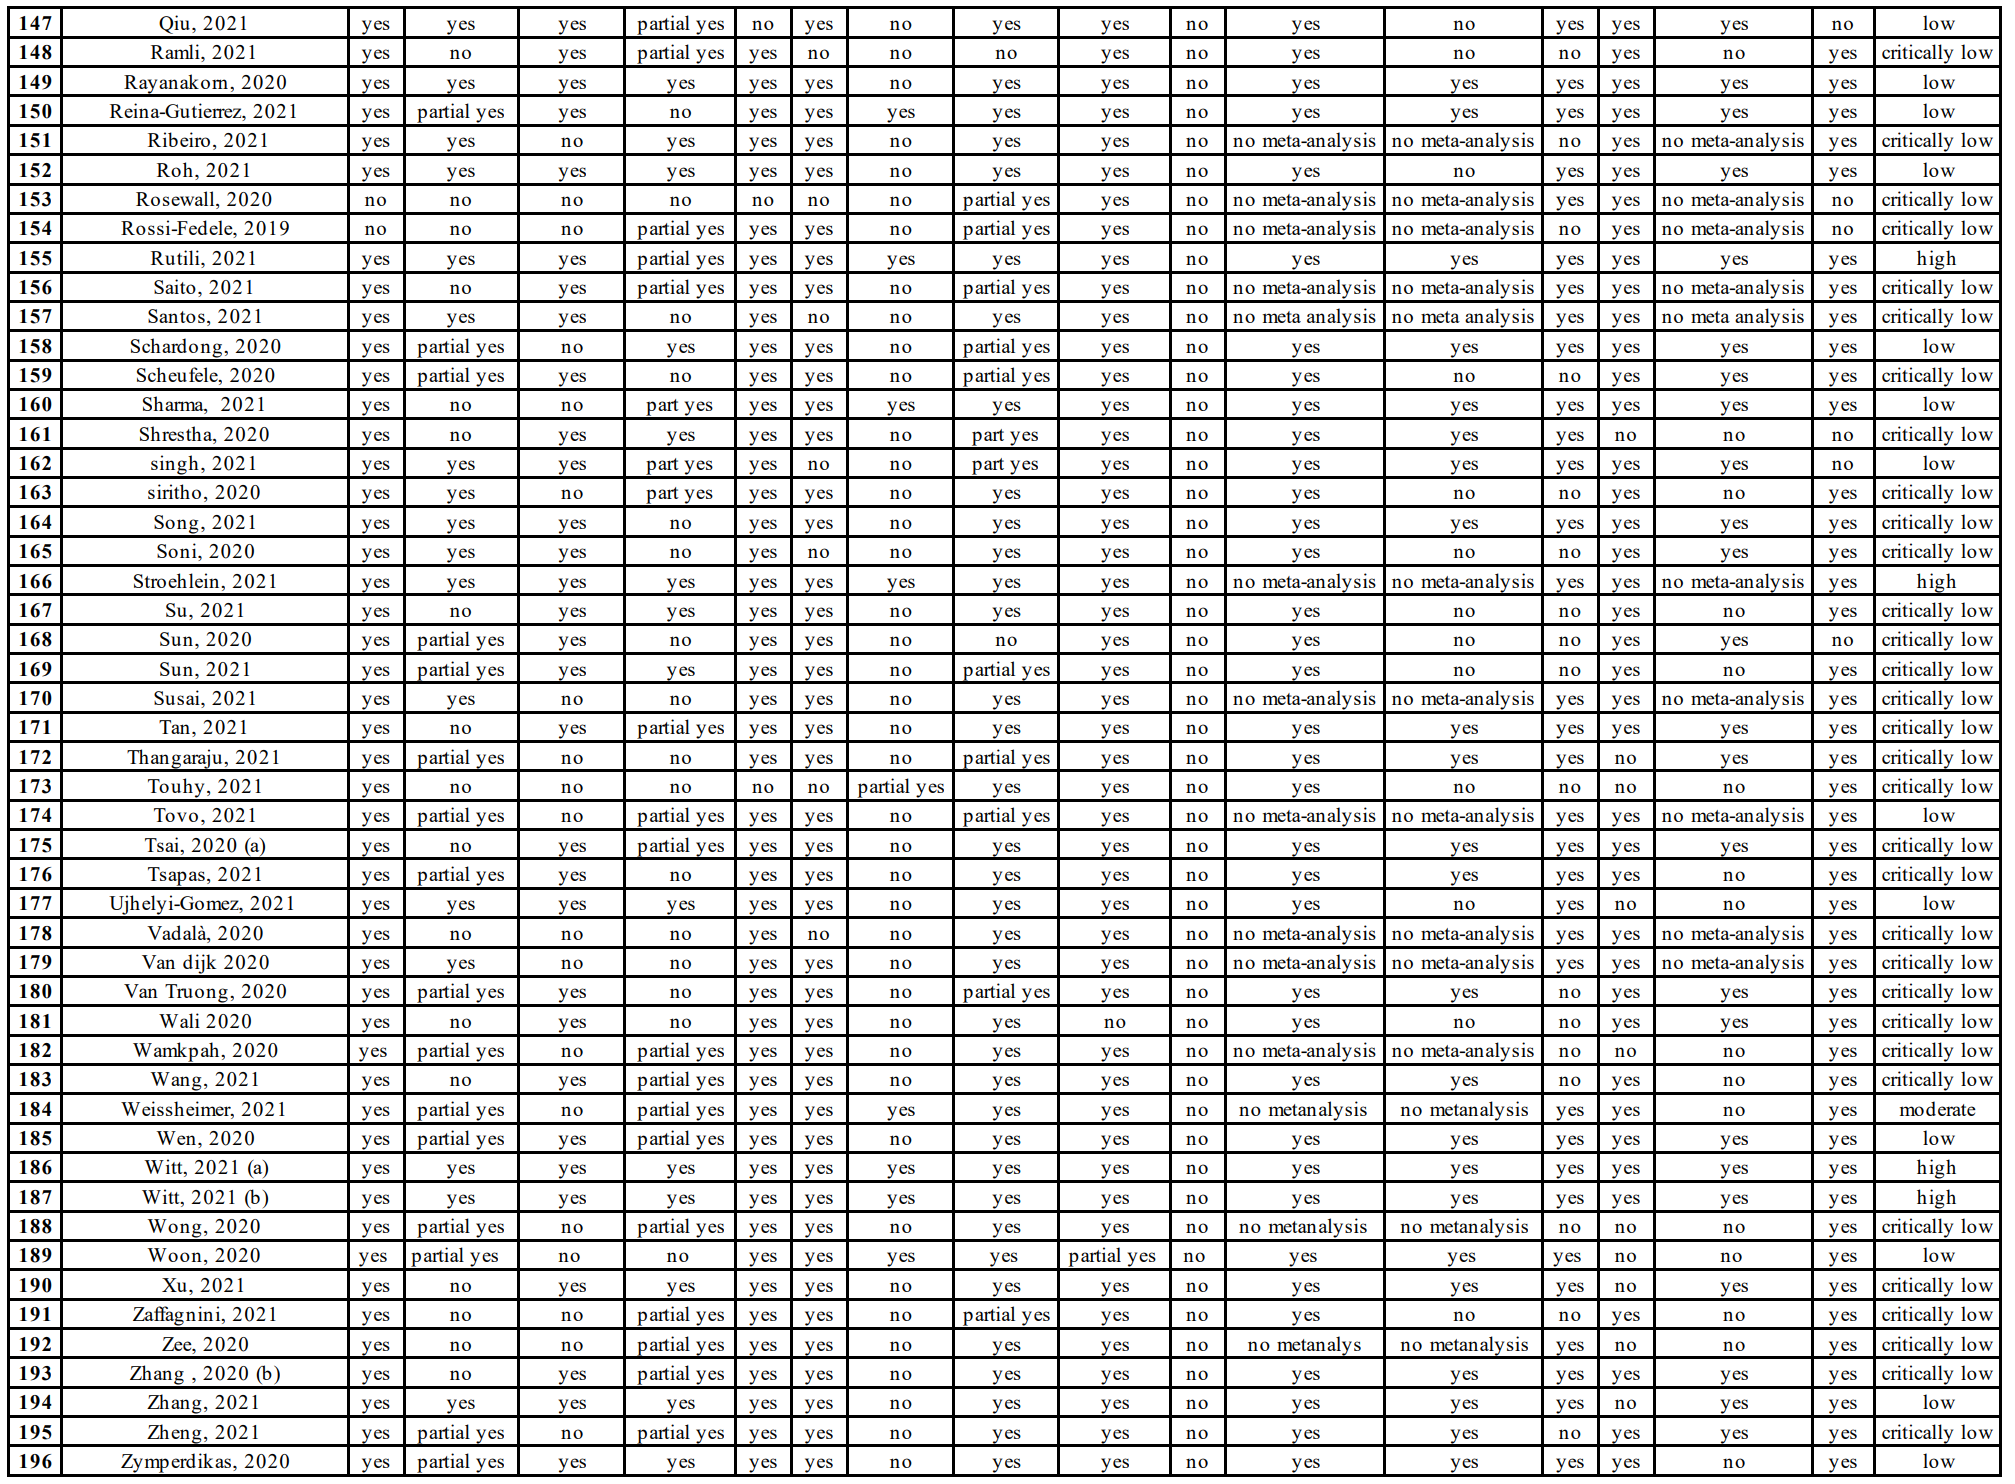

Supplement: mmc1 [file mmc1.docx]
